# Supplementary material
Source: publisher figshare collection journal article supplement (https://gsapubs.figshare.com/ndownloader/files/23994488)
Supplement: Supplementary file 1 [file 23994488]

## Sheet: 100 samples of whole borehore
Analysis No.	Depth (m)	Description	TOC（wt%）	Main elements (wt %)												Trace elements (ppm)
				SiO2	Al2O3	TFe2O3	MgO	CaO	Na2O	K2O	TiO2	P2O5	MnO	H2O-	LOI	Li	Be	B	Si	Sc	Ti	V	Cr	Cr	Mn	Co	Ni	Cu	Zn	Ga	Ge	Rb	Sr	Sr	Y	Zr	Nb	Mo	Rh	Ag	Cd	Sn	Sb	Cs	Ba	Ba	La	Ce	Pr
143-5-1	2817.2	Longmaxi Formation	1.66	53.95	16.87	5.77	3.453.45	2.63	0.78	4.45	0.7	0.11	0.045	0.78	10.94	45.9336	3.57749	0	224990	15.3745	4236.06	181.048	86.8574	92.0621	376.198	21.9709	75.1114	59.1027	126.806	23.7222	1.32013	221.895	149.702	151.922	23.5189	107.762	16.1256	11.6319	0.000251378	0	0.20369	4.38297	0	14.3384	2236.68	2206.92	45.4521	90.9818	9.45511
143-5-2	2818.59		1.62	55.88	16.95	6	2.82	2.2	0.89	4.36	0.74	0.12	0.026	0.74	9.56	50.2016	3.44188	0	243360	16.4303	4415.74	208.483	87.7963	92.4706	230.511	22.0998	81.2216	55.0942	131.956	23.3795	1.47676	215.887	143.186	142.737	28.748	120.47	17.3687	10.7166	0.000319417	0	0.216733	4.48511	0	13.798	1869.92	1872.64	50.3015	99.5606	10.7875
143-5-3	2819.59		1.48	54.52	17.05	6.03	3.05	2.63	0.81	4.45	0.72	0.11	0.031	0.78	10.06	51.8737	3.72138	0	237711	16.8441	4276.19	182.888	93.1346	92.5706	276.526	21.535	74.3204	51.5898	124.84	23.7703	1.39542	219.744	150.639	152.566	27.7149	111.8	17.6706	10.6908	0.000118741	0	0.178308	4.57375	0	14.2405	2007.8	1963.21	49.2145	94.6422	10.4231
143-5-5	2820.96		1.74	49.58	15.72	6.62	3.68	5.01	0.77	4.04	0.68	0.12	0.061	0.98	13.12	42.3802	3.33382	0	203074	15.8056	3995.7	150.222	81.25	85.4741	502.849	24.2697	67.1824	55.6651	92.3908	21.6799	1.29152	200.076	197.787	197.567	28.2422	115.704	17.8777	14.8027	0.000270654	0	0.155979	4.08856	0	12.8067	2027.52	1965.58	47.4778	93.1675	10.1165
143-5-7	2822.84		1.64	54.32	16.43	6.75	2.87	2.77	0.87	4.22	0.75	0.12	0.03	0.84	10.28	49.8444	3.44534	0	218200	16.2913	4378.99	160.883	83.9361	89.2138	261.295	25.1169	65.6581	63.3128	130.524	22.3077	1.37404	211.109	157.197	158.261	29.4596	135.043	17.547	11.4546	0.000271313	0	0.285528	4.64656	0	14.2607	1939.12	1910.7	52.4528	105.496	11.3466
143-5-9	2824.11		1.95	56.48	15.62	6.03	2.5	2.71	1.12	3.96	0.83	0.12	0.025	0.74	9.92	45.9018	3.25816	0	262985	15.0091	4590.75	222.359	81.5418	85.8167	225.195	24.2432	84.6201	60.4697	115.601	21.3562	1.41253	193.464	154.726	156.759	30.1533	162.389	18.5702	9.06751	0.00032435	0	0.294206	4.10969	0	12.5845	1734.82	1728.81	51.9189	103.781	11.1786
143-5-10	2825.2		2.02	57.11	16.29	5.81	2.55	2.13	0.96	4.23	0.75	0.13	0.022	0.82	9.6	45.0261	3.23187	0	243637	15.1365	4302.47	198.955	83.9779	87.866	200.131	22.7762	81.3641	63.5451	123.02	22.361	1.30473	208.488	143.291	144.215	25.9987	120.872	16.1126	12.4833	0.000233381	0	0.318306	4.27599	0	13.9724	1891.89	1859.68	48.7686	97.0118	10.3957
143-5-11	2826.2		1.46	51.44	14.36	6.49	3.4	5.31	0.87	3.73	0.68	0.13	0.053	0.68	11.46	42.8168	3.20029	0	200639	14.8364	4200.1	240.608	78.6248	82.6226	456.915	24.4284	95.3223	57.2096	144.502	20.9033	1.36711	192.306	217.232	219.26	30.2139	114.281	15.932	12.5868	0.000358921	0	0.352669	4.06302	0	12.5378	1873.83	1818.58	47.2486	94.8553	10.3869
143-5-13	2828.18		1.87	53.32	14.63	5.97	3.13	4.63	0.94	3.8	0.68	0.12	0.043	0.74	11	39.7804	2.99852	0	217227	14.1201	3943.91	145.769	73.2742	76.594	364.206	21.7659	69.4645	56.1378	98.076	19.5442	1.2476	187.531	195.378	198.204	28.5187	126.052	16.2216	11.6761	0.000372226	0	0.254622	3.94171	0	12.3074	1828.2	1813.74	46.3054	92.1028	9.88881
143-5-15	2830.17		1.78	57.53	14.97	5.7	2.55	3.25	1.01	3.91	0.7	0.11	0.027	0.75	9.58	42.044	3.08399	0	248023	14.9063	4140.88	145.32	76.2246	79.2422	231.704	22.3597	66.9301	55.8821	99.4666	20.6044	1.25516	195.369	166.735	165.793	26.588	121.026	15.5708	10.1757	0.000394432	0	0.209172	3.94137	0	12.4966	1800.76	1750.88	46.3618	93.7377	10.0202
143-5-17	2832.05		1.61	55.78	13.99	5.89	3	4.08	0.76	3.57	0.6	0.1	0.055	1.08	11.54	41.0122	3.05382	0	232811	13.2921	3582.17	144.057	69.4096	71.5382	449.471	20.6167	66.8536	50.4349	103.747	19.1713	1.29953	181.457	192.949	196.42	28.168	106.192	14.4793	10.1476	0.000338684	0	0.217011	3.93753	0	11.6511	1802.74	1795.46	43.7046	87.3927	9.49344
143-5-19	2833.63		1.71	60.68	13.23	5.05	2.37	3.3	1.1	3.3	0.63	0.13	0.033	0.76	9.64	39.1816	2.67932	0	275149	11.9659	3792.62	119.731	64.674	68.0044	279.507	20.4478	59.313	46.283	90.4035	18.0784	1.20406	161.511	164.637	167.144	25.3377	125.001	14.5828	8.40021	0.000477366	0	0.198768	3.67093	0	9.72284	1662.56	1633.89	39.9339	80.8166	8.68084
143-5-21	2835.62		1.74	60.96	13.57	5.22	2.45	2.62	1.03	3.41	0.64	0.12	0.031	0.88	9.28	41.174	2.81783	0	279617	12.7483	3800.5	123.277	66.9632	70.622	275.38	19.8885	61.8563	47.0093	100.57	18.8816	1.20289	167.364	152.196	155.34	26.0093	127.293	14.7404	8.4246	0.000263399	0	0.237482	3.79237	0	10.6378	1729.55	1701.39	41.1352	84.2866	9.06707
143-5-23	2836.93		1.83	61.1	13.92	5.32	2.43	2.32	1.03	3.49	0.65	0.13	0.029	0.84	8.96	42.7606	3.03399	0	294633	13.3132	3970.98	138.622	71.9151	75.8151	251.663	20.7842	66.614	47.6008	100.051	19.3483	1.19344	181.057	149.662	151.13	26.7384	138.281	15.3762	8.41781	0.000347939	0	0.169062	3.94703	0	11.2933	1795.27	1716.34	42.3265	84.5727	9.25819
143-5-24	2837.92		1.65	61.12	14.28	5.17	2.42	2.17	1.1	3.55	0.67	0.11	0.028	0.8	8.78	42.229	3.05862	0	305400	13.3927	3924.84	128.281	70.7583	73.8484	241.981	19.2881	63.6983	43.6356	93.4824	19.5575	1.23939	179.128	147.326	148.357	26.0255	138.363	15.4886	7.73577	0.000113795	0	0.142875	3.84575	0	11.2397	1749.82	1720.25	42.278	84.1451	9.06895
143-5-25	2839.02		1.8	60.78	14.27	5.32	2.43	2.18	1.05	3.61	0.66	0.11	0.029	0.82	8.9	40.4966	2.77786	0	240152	12.8256	3891.18	136.341	67.5935	71.3275	247.837	20.267	65.4109	46.3741	113.552	19.1123	1.26994	178.567	144.898	146.668	25.8172	145.534	16.7766	8.0309	0.000329282	0	0.191812	3.61653	0	11.35	1792.43	1771.86	42.8929	85.5076	9.30898
143-5-26	2840.15		1.6	60.25	14.73	5.28	2.42	1.7	0.95	3.75	0.65	0.12	0.024	0.8	8.44	42.615	2.92034	0	244741	13.4371	3789.07	129.806	70.8566	74.805	209.987	19.5648	59.9425	44.1301	94.2393	20.6423	1.28913	189.945	133.453	133.536	28.3303	156.788	21.5626	6.11903	0.000188737	0	0.127156	4.00435	0	11.9533	1877.15	1816.62	46.6104	94.2446	10.0601
143-5-27	2841.05		1.67	59.84	13.77	6.35	2.47	2.25	1	3.5	0.62	0.12	0.033	0.7	9.38	38.4415	2.89201	0	260619	12.9016	3683.1	124.596	65.225	69.491	280.845	25.4206	83.4332	47.5364	151.772	18.4495	1.29422	173.977	145.761	144.596	26.0592	133.336	14.1455	9.25838	0.000419738	0	0.292985	3.8402	0	10.8951	1711.28	1702.13	39.5575	80.3799	8.71208
143-5-29	2842.58		1.45	62.62	13.83	4.82	2.34	1.95	1.06	3.58	0.62	0.12	0.026	0.82	8.36	37.7178	2.88267	0	224878	12.1056	3618.83	110.524	63.0622	65.6022	224.801	19.8549	57.0443	39.9833	87.9102	18.3259	1.10721	173.654	142.396	144.02	25.9288	137.395	14.1713	6.89958	0.000228933	0	0.143633	3.70896	0	10.5224	1773.56	1750.95	40.2057	81.5345	8.92382
143-5-31	2844.41		0.49	64.71	17.23	2.45	1.77	0.78	0.94	4.37	0.35	0.072	0.007	1.14	6.74	25.6758	3.19103	0	264699	9.11942	2072.84	43.2896	28.8399	30.0438	83.1315	11.2072	19.4289	16.3909	57.7445	20.1645	1.04019	185.619	131.161	132.726	39.5288	148.064	16.8279	3.65994	0.000149918	0	0.0971553	6.48176	0	11.1268	2946.92	2886.19	42.6772	91.0059	9.87506
143-5-32	2844.89		1.45	65.63	12.48	3.57	1.82	2.75	1.56	3.33	0.64	0.12	0.02	0.64	7.54	31.9764	2.32508	0	223194	10.2394	3760.36	100.219	56.2677	58.7365	187.057	19.549	53.2734	28.9745	69.641	17.3623	1.1286	147.819	160.958	163.671	31.5989	254.223	15.6886	8.9456	0.00024466	0	0.154238	3.25246	0	7.55113	1649.61	1595.74	42.0003	84.6415	9.22427
143-5-33	2846.59		1.97	59.64	14.45	4.58	2.4	3.15	1.54	3.61	0.72	0.12	0.027	0.64	9.1	37.567	2.90513	0	219948	12.4432	4293.21	136.426	69.6857	73.4806	238.42	21.2335	70.1955	43.9397	116.508	20.1336	1.16005	172.035	173.432	173.44	30.1478	198.09	16.5815	12.9933	0.00031172	0	0.18926	3.85186	0	10.238	1723.88	1689.09	45.2691	91.6877	9.73737
143-5-35	2848.42		1.88	60	14.01	5.61	2.36	3.23	1.63	3.49	0.71	0.13	0.032	0.64	9.06	37.9997	2.78695	0	234113	12.223	4213.44	127.283	67.6265	71.3659	272.987	21.5957	68.3076	40.9311	112.552	19.2403	1.2245	162.671	177.93	179.835	31.1009	214.777	15.8924	11.5513	0.000315136	0	0.191675	3.71978	0	9.43914	1635.44	1620.11	44.0436	89.7092	9.45215
143-5-37	2850.04		1.5	51.15	12.9	5.8	3.68	6.79	1.3	3.21	0.62	0.11	0.099	0.58	12.44	35.0043	2.83841	0	236576	11.4554	3676.13	139.679	58.5738	62.63	812.358	16.7135	56.1828	33.2886	108.218	18.4911	1.34236	158.21	257.736	257.897	33.8167	179.628	14.3364	9.67619	0.000486078	0	0.218828	3.8018	0	8.95605	1740.64	1675.59	41.8623	84.8353	9.29989
143-5-39	2851.78		2.28	58.78	14.21	5.08	2.57	2.73	1.48	3.68	0.71	0.12	0.039	0.62	9.08	36.5724	2.92611	0	313591	12.7758	4217.84	134.287	70.4837	75.1123	334.609	23.945	64.2049	47.7621	107.942	20.2567	1.25937	177.678	164.021	164.01	29.6854	185.188	16.2937	10.8944	0.000324364	0	0.217617	3.85005	0	10.5228	1803.68	1762.49	43.416	89.121	9.46827
143-5-40	2852.79		3.19	62.14	14.38	4.56	2.14	2.23	1.56	3.59	0.73	0.13	0.024	0.62	8.26	39.6465	2.94881	0	276944	13.1331	4416.41	167.795	74.1009	77.6032	198.493	22.1868	69.0805	48.8358	112.653	20.3998	4.38904	177.88	152.072	154.794	32.813	206.033	16.5519	12.3165	0.00029972	0	0.244185	4.08538	0	10.5798	1760.98	1712.67	45.4469	92.7098	10.0979
143-5-41	2853.79		2.93	65.08	13.34	4.04	1.86	1.62	1.3	3.36	0.67	0.12	0.019	0.76	8.3	36.7355	2.78293	0	332701	12.1262	3932.94	112.163	64.6733	68.2133	155.93	24.6452	51.0256	50.5628	96.5384	18.5825	1.24936	167.259	129.252	131.073	30.6	166.432	15.7028	14.2316	0.000330872	0	0.245634	4.00373	0	10.3223	1785.12	1749.08	40.9422	83.6282	9.01368
143-5-43	2855.39		2.5	59.8	13.48	4.91	2.45	3.33	1.42	3.42	0.7	0.13	0.039	0.66	9.82	39.005	2.81915	0	249669	12.584	4249.08	157.791	69.8046	72.2838	313.25	25.5845	64.9747	43.9183	112.892	19.4052	1.27432	170.076	180.033	181.594	32.203	202.9	16.5283	12.3406	0.000265636	0	0.239067	3.83497	0	9.9015	1698.54	1647.35	42.749	85.6624	9.39472
143-5-45	2856.88		1.51	36.01	9.8	7.33	6.67	12.63	0.78	2.62	0.51	0.12	0.16	0.54	21.42	23.6585	2.39242	0	207123	9.48732	3014.73	132.72	53.0618	54.8828	1283.15	18.5232	49.9093	38.9044	83.5891	14.1141	1.11795	130.038	278.131	276.187	27.1407	115.496	11.6574	12.2893	0.000424112	0	0.213916	2.92172	0	7.70523	1662.25	1626.36	33.3238	64.3641	7.37604
143-5-47	2859.25		2.6	60.65	14.15	5.07	2.07	2.22	1	3.73	0.66	0.12	0.023	0.86	9.92	38.2912	3.1693	0	251658	13.4718	3936.14	176.562	74.4439	76.934	183.101	24.7243	75.7936	58.9688	117.574	20.0667	1.30771	190.898	141.444	141.412	32.0948	170.045	21.1247	13.5053	0.000199798	0	0.23949	3.83852	0	12.7597	1875.91	1833.86	47.8714	95.0045	10.2186
143-5-49	2860.54		2.71	60.81	13.63	5.04	2.06	2.45	0.96	3.71	0.63	0.11	0.027	0.82	10.28	37.0059	2.97693	0	320592	12.9382	3755.41	172.515	68.4361	71.2902	217.2	26.4647	85.0615	61.0952	121.792	19.1746	1.30969	183.333	150.031	148.159	26.4111	122.169	14.4034	19.7556	0.000292241	0	0.261211	3.65875	0	12.3124	1928.97	1876.72	41.1107	83.4108	9.01864
143-5-51	2861.5		3	61.62	13.59	4.89	2.01	2.22	0.97	3.61	0.65	0.12	0.023	0.66	9.72	38.2098	2.99165	0	256816	13.7624	4029.49	189.625	75.8948	77.7393	188.834	21.7307	81.8291	65.564	122.554	19.9505	1.32737	191.663	147.221	145.955	30.7045	133.696	15.5607	18.5672	0.00030994	0	0.225642	3.93347	0	12.5435	1920.01	1893.83	44.8931	90.7461	9.91428
143-5-53	2863.01		3.2	61.4	13.37	4.62	1.89	2.53	0.99	3.67	0.66	0.12	0.023	0.82	10.48	34.7716	3.13395	0	280053	13.2389	3983.51	192.575	72.0586	73.729	188.068	25.1999	83.304	68.9783	143.191	19.3506	1.24984	186.283	146.495	147.179	27.996	135.832	15.3826	19.8155	0.000192837	0	0.32145	3.73578	0	12.2544	1892.59	1842.62	42.4052	85.7126	9.36614
143-5-55	2864.04		2.85	61.21	13.07	4.71	1.94	2.62	0.9	3.55	0.62	0.12	0.025	0.9	10.9	33.5734	3.08819	0	311370	12.9671	3728.25	182.746	71.1691	74.7879	206.61	37.9129	76.7843	67.8737	124.839	18.8354	1.38522	182.406	149.818	148.792	29.0961	125.783	15.0082	19.7718	0.000322283	0	0.339142	3.69722	0	11.8865	1916.16	1878.57	43.5249	85.6142	9.53772
143-5-57	2865.67		3.05	63.85	11.63	4.52	1.69	2.82	0.88	3.24	0.58	0.13	0.022	0.64	10.42	29.2597	2.71447	0	293810	11.1659	3420.7	193.201	63.8177	65.9347	178.968	25.2004	93.0623	63.9061	130.406	16.6865	1.1664	162.201	149.478	147.663	28.7224	124	13.5726	20.5443	0.000407563	0	0.3592	3.22999	0	9.92623	1825.39	1787.25	39.8808	79.3193	8.87382
143-5-58	2867.17		3.99	63.54	12.14	4.4	1.68	2.2	0.81	3.41	0.59	0.12	0.02	0.92	10.88	29.1487	2.89719	0	322901	12.1427	3489.22	191.397	66.8145	68.7116	156.768	24.4353	97.6805	75.6883	136.438	17.4956	1.22871	167.458	135.672	134.787	27.1655	114.516	13.9213	24.0826	0.000245409	0	0.386796	3.42671	0	11.1106	1896.46	1865.38	40.6978	81.2759	8.89816
143-5-59	2867.97		3.78	66.1	10.99	3.97	1.56	2.23	0.76	3.12	0.55	0.12	0.019	0.78	10.38	27.1044	2.47216	0	285653	10.715	3202.76	173.625	59.2425	61.0711	152.572	22.9369	86.1923	71.0015	114.778	15.3303	1.14613	153.402	129.075	130.534	25.9972	111.593	13.3221	20.5733	0.000189889	0	0.362226	3.24495	0	9.45655	1799.05	1778.84	38.0665	71.9256	8.37617
143-5-61	2869.82		2.64	59.58	12.23	4.07	1.64	5.06	0.98	3.41	0.66	0.15	0.02	0.7	11.52	28.2155	2.73586	0	295668	11.5745	3913.32	265.966	68.1757	70.9364	166.756	21.2906	105.883	56.3287	145.017	17.0424	1.13301	164.08	193.081	192.306	30.7685	163.913	15.325	27.9996	0.000462852	0	0.42561	3.47585	0	10.471	1768.35	1746.71	43.997	87.9594	9.59029
143-5-62	2870.62		2.4	57.68	11.25	4.33	2.01	5.95	0.95	3.16	0.61	0.15	0.031	0.66	12.74	26.2113	2.7232	0	225088	10.7573	3645.78	203.752	63.6509	67.5571	258.951	23.3277	95.8883	51.0553	123.665	16.0039	1.12988	149.923	211.897	213.047	29.533	156.817	14.7208	27.8875	0.000392675	0	0.47623	3.31295	0	9.44433	1743.52	1697.17	39.7806	77.5623	8.68269
143-5-63	2871.56		2.69	57.53	11.89	4.63	2.02	5.45	0.93	3.29	0.63	0.16	0.029	0.62	12.08	27.6406	3.04961	0	300126	12.091	3788.25	236.808	67.8809	68.7707	245.938	22.992	111.915	58.5143	135.935	17.1528	1.22554	166.404	205.138	207.31	31.888	141.633	14.979	29.1172	0.000227019	0	0.470271	3.55156	0	10.3045	1845.75	1830.23	42.507	83.4465	9.50847
143-5-65	2873.3		3.15	65.84	10.16	3.64	1.41	3.37	0.81	2.87	0.54	0.13	0.018	0.92	10.96	26.6104	2.47248	0	315015	10.1033	3148.74	199.452	56.6634	59.4682	157.36	26.1873	104.952	55.7138	124.057	14.5254	1.58034	138.339	155.207	154.786	25.9346	122.024	13.4185	30.0988	0.000312455	0	0.438276	3.04052	0	8.13894	1740.55	1699.08	35.8033	68.5032	7.99958
143-5-66	2874.11		3.38	63.7	11.42	3.45	1.43	3.82	0.92	3.12	0.59	0.13	0.017	0.66	10.74	26.6066	2.68391	0	424375	11.2102	3530.24	216.341	65.539	67.7995	143.361	20.6904	90.0767	54.4073	130.158	16.5102	1.15873	153.105	162.208	166.516	29.8683	152.373	15.0079	25.963	0.00055609	0	0.374384	3.36057	0	9.1775	1805.13	1770.71	42.528	86.5661	9.54882
143-5-67	2874.61		3.12	62.1	10.45	3.87	1.82	4.8	0.84	2.93	0.55	0.12	0.028	0.84	11.88	26.7885	2.52902	0	271990	10.2817	3299.19	249.331	60.8205	64.5625	236.616	21.1605	105.374	57.2033	146.203	15.2931	1.09757	146.567	186.795	188.768	27.9511	134.922	13.5739	32.3285	0.00036804	0	0.405601	3.00096	0	8.44162	1722.05	1682.55	36.3864	69.4263	8.03051
143-5-69	2875.26		3.08	64.56	9.53	3.57	1.38	4.71	0.7	2.68	0.5	0.13	0.02	0.86	10.5	25.6911	2.43761	0	367998	9.46355	2900.15	185.162	54.3706	56.9835	174.809	25.5722	105.025	52.0072	111.151	13.8697	1.0445	126.736	177.759	179.336	25.5522	100.505	11.9204	29.5023	0.000285414	0	0.362828	2.70267	0	7.96538	1704.83	1679.68	33.239	63.2667	7.46741
143-5-71	2876.36		2.96	62.9	10.6	3.97	1.46	4.47	0.93	3	0.57	0.16	0.02	0.64	9.74	25.9495	2.63505	0	351028	9.69597	3424.71	220.368	61.8269	64.8739	172.853	21.0155	110.613	56.8193	124.557	16.0118	1.18568	142.513	183.835	185.923	31.9539	136.389	14.7558	32.5803	0.000502299	0	0.533284	3.28254	0	8.52563	1737.7	1695.62	43.6848	86.8024	9.48761
143-5-73	2877.22		3.58	64.75	9.77	3.9	1.39	3.85	0.83	2.74	0.51	0.14	0.018	0.7	10.24	23.3205	2.53736	0	305283	9.28452	2924.48	202.436	54.4585	57.212	153.474	22.1527	107.946	55.1888	103.481	14.1308	1.11768	128.843	161.364	161.674	27.8309	108.204	12.7018	36.4656	0.000347347	0	0.583188	2.73617	0	7.51374	1640.08	1586.4	33.5214	64.8094	7.583
143-5-75	2878.12		4.36	62.92	10.87	4.03	1.51	3.8	0.86	2.94	0.54	0.13	0.019	0.92	11.74	24.1745	2.76772	0	277890	10.0744	3131.59	245.061	59.5335	62.8615	165.186	24.9933	128.37	66.3329	134.498	14.8142	24.452	140.027	162.796	166.663	28.6877	111.788	12.7744	41.6582	0.000329336	0	0.494566	2.96232	0	8.49529	1697.8	1660.26	35.3042	67.9373	7.93741
143-5-77	2879.03		3.84	65.98	9.23	3.57	1.43	4	0.73	2.58	0.47	0.15	0.02	0.64	9.06	22.9102	2.54805	0	275772	9.12363	2763.31	197.23	51.9687	54.3254	170.228	20.8024	110.834	58.8301	105.61	13.2512	1.04507	117.55	167.88	166.171	29.1566	96.3934	11.7233	37.1224	0.000165424	0	0.587524	2.45018	0	7.19491	1652.48	1611.98	33.1445	65.3846	7.75075
143-5-79	2879.83		4.2	64.48	10.04	3.77	1.43	3.95	0.84	2.81	0.52	0.15	0.02	0.72	9.14	23.4896	2.60195	0	308892	9.62733	3078.87	194.628	56.1591	57.833	168.695	23.3892	102.331	57.4007	104.949	14.2473	1.10244	133.521	167.763	167.091	26.8867	107.814	12.624	39.5542	0.000192993	0	0.644067	2.86866	0	7.75343	1678.93	1647.11	34.2646	65.4937	7.71667
143-5-81	2880.61		3.37	65.4	9.51	3.4	1.71	3.85	0.78	2.75	0.49	0.11	0.023	0.58	11.38	24.6315	2.70596	0	336597	9.67925	3036.37	234.12	56.6871	59.0386	198.723	16.7358	107.046	59.1555	118.429	14.4283	1.11474	131.095	165.198	166.303	27.2251	113.04	12.9905	37.2006	0.000166181	0	0.448857	2.82215	0	7.4879	1706.44	1687.9	34.5144	65.7943	7.74683
143-5-83	2881.61		3.96	66.77	8.86	3.28	1.64	3.53	0.79	2.58	0.49	0.12	0.022	0.82	11.64	23.1991	2.39552	0	280042	8.75234	2807.77	228.163	50.6762	53.2906	180.974	20.4101	110.938	61.391	133.273	13.3054	0.993643	112.414	153.743	153.382	28.2208	112.583	11.779	39.5038	0.000163759	0	0.492596	2.61226	0	6.50652	1577.51	1542.97	32.1853	62.9131	7.56264
143-5-85	2882.65		5.11	63.17	11.18	4.27	1.39	2.72	0.91	3.13	0.57	0.13	0.013	0.9	11.82	23.0394	3.18925	0	382237	10.5439	3344.2	260.336	62.1881	65.9939	116.756	26.375	134.902	67.5082	85.6671	16.5101	1.11795	145.834	143.98	144.735	28.1227	141.756	16.5887	46.9416	0.000295024	0	0.495675	3.32002	0	8.5396	1847.79	1859.31	39.3927	78.518	8.74906
143-5-87	2883.39		3.42	68.74	8.72	3.35	1.36	3.09	0.69	2.53	0.45	0.11	0.016	0.52	10.42	23.8414	2.56158	0	330714	8.77069	2662.23	203.322	49.9318	52.8134	138.254	18.1275	107.609	56.3702	122.112	12.9029	1.05429	114.185	143.808	142.652	25.032	99.6801	12.1106	37.146	0.000221322	0	0.375438	2.58609	0	6.76645	1681.82	1642.3	30.8217	59.9833	7.13377
143-5-89	2884.29		3.94	70.22	8.04	3.43	1.21	2.9	0.7	2.31	0.41	0.11	0.014	0.68	10.6	22.3247	2.3012	0	329781	7.87842	2456.63	174.547	43.7913	46.1696	119.391	17.6792	98.5742	56.1704	96.5849	11.8402	1.00704	102.411	133.041	134.955	24.4948	102.861	11.2028	39.5457	0.000166655	0	0.399649	2.30215	0	5.83732	1555.53	1520.04	29.3017	56.4333	6.64327
143-5-91	2885.09		3.31	52.71	7.41	4.25	4.51	9.22	0.8	2.14	0.37	0.088	0.1	0.56	17.74	15.8802	2.12105	0	250565	7.80975	2186.06	122.821	37.5453	39.4237	859.87	18.9012	72.052	36.3553	99.7685	10.3323	0.922355	87.947	282.73	282.774	32.428	104.035	8.8888	18.677	0.000259093	0	0.490053	2.01694	0	4.71443	1496.47	1469.33	34.4418	67.2362	7.86732
143-5-93	2885.38		4.06	61.35	11.96	3.83	1.69	3.26	1.17	3.42	0.61	0.13	0.017	0.88	12.5	23.555	3.50768	0	284287	11.1399	3697.25	263.717	66.306	69.886	148.634	23.1285	132.737	72.869	142.196	17.6713	1.08033	159.212	168.437	166.728	33.3542	156.744	15.0813	61.7385	0.000271683	0	0.738873	3.38219	0	9.32349	1870.39	1803.82	41.8483	83.685	9.41632
143-5-95	2886.08		4.4	67.06	10.12	3.34	1.29	2.31	0.9	3.01	0.52	0.095	0.012	0.68	11.18	22.6388	3.05291	0	292938	9.62113	3039.43	234.119	56.915	59.0271	102.404	19.4381	125.582	75.6219	140.458	15.3639	1.1284	129.73	128.434	131.077	26.1403	111.401	13.4703	56.3906	0.000265023	0	0.448865	2.95914	0	7.9077	1756.48	1690.92	36.1851	68.9032	8.19827
143-5-97	2886.48		3.81	69.83	8.68	2.78	1.41	2.77	0.82	2.55	0.44	0.088	0.015	0.56	10.56	21.1865	2.55297	0	301354	8.21023	2656.11	212.807	48.679	51.0919	135.806	16.9247	112.499	50.6632	113.157	13.2476	1.07106	109.734	139.743	142.055	26.4128	109.427	12.5136	46.9367	0.000209065	0	0.360666	2.43884	0	6.17568	1654.79	1596.47	32.1522	61.3923	7.19568
143-5-99	2886.88		4.08	67.31	9.15	2.91	1.54	3.17	0.86	2.63	0.46	0.12	0.017	0.76	11.42	20.7773	2.65051	0	337689	8.95858	2722.09	216.92	51.4676	53.4621	148.288	22.0591	106.617	52.5951	115.346	13.8854	1.00013	113.743	152.009	151.235	30.9007	129.538	15.8368	45.264	0.000349785	0	0.432605	2.63357	0	6.43493	1676.98	1628.36	35.0904	67.4802	7.97831
143-5-101	2887.38		3.2	75.13	6.49	2.37	1.24	2.66	0.61	1.9	0.33	0.076	0.016	0.38	9.08	21.8578	1.94654	0	321152	6.04842	1922.49	135.765	34.7235	35.6714	136.195	16.0736	81.9656	38.4572	92.7316	10.3612	0.894449	80.0086	122.257	123.647	23.9362	105.927	14.6492	40.02	0.000271755	0	0.227634	1.83404	0	4.23731	1453.79	1407.7	30.5192	56.9465	6.56913
143-5-103	2887.67		4.85	67.59	9.7	2.73	1.43	2.94	0.92	2.78	0.45	0.1	0.014	0.66	11.26	21.3883	3.03337	0	332513	9.25037	2761.77	249.981	51.765	53.9483	129.258	16.3793	118.391	50.2147	176.965	14.8349	1.1743	118.197	147.26	146.527	33.4485	150.945	17.1112	53.5199	0.000311681	0	0.394149	2.89521	0	6.94872	1784.45	1739.03	38.8401	76.5521	8.74425
143-5-105	2888.17		5.11	68.19	9.13	3.73	1.24	2.19	0.87	2.63	0.45	0.09	0.012	0.68	11.52	19.7007	2.8602	0	310044	8.50865	2726.68	234.346	49.5832	51.8801	106.827	23.9792	141.546	64.6897	121.145	13.8472	1.04383	113.306	126.065	126.164	26.8819	100.951	11.9827	65.9436	0.000279632	0	0.330516	2.89489	0	6.33034	1680.2	1617.09	32.9166	61.5628	7.37605
143-5-107	2888.37		5.18	61.07	10.26	4.36	2.01	3.95	1.09	2.9	0.51	0.12	0.022	0.58	13.04	18.8629	3.32685	0	267774	10.1835	3135.19	383.597	60.9548	64.229	196.978	20.916	181.553	69.1264	221.672	15.6992	16.9493	128.298	181.149	182.451	39.6664	142.116	12.9968	90.2494	0.000436139	0	0.481429	2.89668	0	7.66501	1768.55	1733.4	38.604	73.1492	8.89678
143-5-109	2888.57		5.25	69.07	8.84	2.81	1.38	2.89	0.83	2.51	0.44	0.097	0.015	0.5	10.9	19.8153	2.83239	0	349589	8.69924	2655.29	291.267	49.9949	51.9689	127.871	20.1356	133.391	59.8151	157.648	13.5827	1.51623	111.406	140	141.999	31.3367	108.415	11.0017	67.5302	0.000217048	0	0.272568	2.34851	0	6.34716	1647.44	1575.7	32.3029	60.9054	7.42563
143-5-111	2888.77		4.94	67.78	9.33	2.84	1.46	3.01	0.96	2.73	0.48	0.12	0.015	0.52	10.98	19.7046	3.01773	0	529116	9.20413	2867.13	340.094	55.0366	57.5261	126.241	17.0841	139.942	58.0828	177.264	13.8783	1.09175	116.117	143.083	143.077	33.6371	120.193	11.7287	71.3242	0.000300721	0	0.323269	2.54281	0	6.62499	1589.46	1547.56	33.2792	63.7768	7.66898
143-5-113	2888.95		4.2	69.48	9.19	2.76	1.24	2.41	0.91	2.64	0.48	0.099	0.012	0.58	10.64	20.131	2.94629	0	322781	8.98146	2804.39	373.356	55.8241	57.788	103.288	20.4105	144.436	53.3392	207.014	13.8344	0.978054	115.782	125.733	126.152	27.0518	113.842	11.3443	82.0521	0.000246095	0	0.383564	2.56242	0	6.50712	1617.02	1571.7	33.6607	64.1281	7.60364
143-5-115	2889.17		5.47	69.9	8.55	2.73	1.26	2.56	0.79	2.51	0.43	0.09	0.012	0.84	10.76	20.1214	2.7834	0	347663	8.34766	2496.02	335.649	48.7653	50.7267	103.811	20.8205	140.958	58.7698	180.51	12.9991	1.01294	107.994	127.261	127.179	28.6899	96.896	10.5572	70.5377	0.000435285	0	0.358758	2.24062	0	6.28586	1568.53	1536.89	31.1411	59.1691	7.25495
143-5-117	2889.77		6.13	67.06	9.08	3.7	1.39	2.74	0.87	2.56	0.45	0.1	0.013	0.66	11.34	18.8877	2.75151	0	315030	8.4725	2621.57	332.925	51.8662	54.8043	114.977	21.7289	174.386	64.577	215.141	13.5761	1.03348	114.279	130.208	131.592	31.9461	113.167	12.0198	89.6654	0.00048823	0	0.423416	2.5338	0	6.51807	1552.31	1509.22	32.9996	62.8221	7.63965
143-5-119	2890		5.72	59.71	11.26	3.76	2.06	3.68	1.12	3.05	0.55	0.11	0.022	0.82	13.2	19.7438	3.53019	0	230590	10.5401	3298.34	460.22	64.5391	67.8563	192.189	21.0565	186.153	58.9395	190.589	17.4629	1.17363	149.533	165.698	166.016	38.6645	157.113	18.0053	101.324	0.000149984	0	0.454086	2.97715	0	8.3594	1828.7	1787.48	43.1723	86.4317	9.5925
143-5-121	2890.2		6	61.43	12.16	3.7	1.54	2.39	1.42	3.31	0.6	0.12	0.012	0.88	12.68	20.7623	3.83725	0	245712	11.468	3602.78	526.855	72.708	76.0477	107.967	20.9751	208.32	66.8875	341.225	18.8035	1.27165	161.463	139.229	141.026	41.462	167.008	17.6039	125.329	0.000465206	0	1.06808	3.57929	0	9.07868	1857.3	1823.61	47.5336	94.7001	10.807
143-5-123	2890.3		6.94	63.21	10.82	3.63	1.43	2.08	1.18	2.96	0.56	0.12	0.012	0.7	12.04	20.1434	3.4566	0	257864	10.2733	3238.71	641.883	74.3203	77.3827	106.321	22.0993	238.253	74.0679	443.096	16.8142	1.15282	142.496	125.915	127.106	44.633	152.356	15.0639	119.66	0.000183892	0	1.80096	2.94946	0	8.38554	1625.88	1607.69	42.5761	84.538	9.85421
143-5-125	2890.55		7.28	65.72	10.12	3.22	1.28	1.94	1.15	2.78	0.52	0.12	0.012	0.78	12.02	19.7054	3.26949	0	274474	9.36856	3059.68	675.43	71.208	73.7599	101.146	16.6989	220.302	92.6468	390.837	15.3293	1.08811	123.334	117.078	120.811	37.7759	141.256	12.8738	117.258	0.000251484	0	2.42884	2.92011	0	7.45912	1541.52	1533.12	37.8837	71.7808	8.8244
143-5-125-2	2890.8		5.03	57.95	2.49	0.71	0.89	16.47	0.39	0.54	0.14	0.25	0.034	0.34	19.44	7.71453	0.882187	0	265686	4.83686	720.813	368.606	51.4489	53.7107	277.622	9.14995	102.004	66.2432	948.22	4.06031	0.978703	27.3818	646.633	656.384	54.675	50.0662	3.18928	21.5953	0.000757435	0	8.59665	0.623517	0	1.60926	767.94	799.446	20.6934	26.991	4.27126
143-5-127	2891.05		2.14	69.52	8.16	1.28	1.04	5.99	0.67	2.35	0.41	0.12	0.021	0.52	10.16	23.6144	2.82171	0	315933	7.56081	2325.56	99.4343	48.2606	50.8929	173.95	12.738	58.3463	43.4981	101.571	11.8907	0.707535	105.164	227.419	227.345	15.3895	107.269	9.7104	3.41944	0.00038038	0	0.691723	1.87173	0	5.98795	1476.87	1436.92	27.3774	45.8061	4.8851
143-5-128	2891.1	Guanyinqiao Bed	1.8	64.06	6.53	1.41	2.16	8.81	0.59	1.84	0.32	0.13	0.057	0.52	13.44	22.5761	2.26206	0	487263	7.137	1972.33	63.5222	34.4299	36.3253	444.106	7.08331	42.7094	31.3725	103.27	9.4333	117.855	82.8509	275.708	276.282	17.6676	111.147	8.26719	2.01534	0.000416058	0	0.653236	1.48116	0	4.34597	1382.33	1349.63	23.3808	41.1493	4.67596
143-5-128-1	2891.21		0.22	13.61	3.51	5.6	12.4	26	0.43	0.8	0.2	0.18	0.38	0.32	33.2	6.29376	2.10124	0	134170	4.13435	1133.69	38.8996	19.1663	20.0666	3091.93	5.50727	34.2162	9.93015	29.5673	4.8924	0.58241	39.9558	487.626	484.815	14.4789	81.4088	5.36137	1.77452	0.000934159	0	0.138089	0.831608	0	2.08607	2086.61	2061.01	14.9251	25.8099	3.08229
143-5-129	2891.3		0.43	13.12	3.48	4.04	13.78	26.25	0.39	0.78	0.2	0.18	0.34	0.32	36.98	5.86997	1.64965	0	84981.4	4.0103	1097.61	43.0397	19.0486	20.1515	2692.97	4.79487	18.067	6.80868	26.163	4.75113	0.540188	38.5303	502.862	504.983	18.3775	74.5728	5.34377	3.5044	0.000875563	0	0.108182	0.785328	0	2.03157	1009.27	1030.8	16.3325	27.2804	3.25924
143-5-130	2891.35		0.8	14.5	3.33	3.76	13.49	26.26	0.38	0.77	0.19	0.21	0.3	0.36	36.54	6.43052	1.66292	0	89554.1	3.93822	1087.9	44.1791	18.1806	19.4992	2384.68	6.95861	18.8427	7.47034	27.5564	4.55141	0.565726	38.1768	485.521	482.877	21.6776	76.7504	5.33392	3.93818	0.000944145	0	0.114781	0.759999	0	1.98499	937.181	961.883	18.1468	29.2846	3.57232
143-5-131	2891.45	Wufeng Formation	5.28	41.78	6.1	4.19	6.88	12.1	0.9	1.6	0.31	0.11	0.15	0.58	25.54	12.0357	2.01762	0	194443	8.20879	1839.49	108.149	33.884	35.8005	1136.44	24.2225	81.7516	72.3805	31.8963	9.46209	0.760101	69.1746	306.111	304.833	31.9359	90.9531	7.89278	43.7686	0.000794882	0	0.160958	1.48855	0	4.11522	744.94	784.46	28.5215	54.4724	5.86517
143-5-132	2891.55		6.23	61.78	8.54	3.91	1.62	4.22	1.45	2.14	0.44	0.18	0.032	0.74	15.64	16.7143	2.73037	0	189642	8.34688	2678.12	125.323	51.9908	54.3598	261.493	37.642	121.465	113.891	56.0116	13.4498	0.96428	99.6266	163.678	165.523	41.2297	131.59	12.4657	70.0632	0.000439802	0	0.275549	2.07157	0	6.11925	975.777	982.722	37.1519	77.8763	8.88414
143-5-134	2891.85		5.84	72.79	6.41	2.09	1.04	3.05	0.48	1.76	0.33	0.092	0.01	0.66	11.94	23.8173	2.11191	0	282193	6.91458	1944.98	226.692	46.4688	49.2753	86.293	14.4698	123.254	47.341	165.037	10.0529	0.789313	80.166	122.732	122.375	29.6442	91.2432	7.56535	62.4645	0.000175386	0	0.819212	1.58147	0	4.32036	1108.68	1144.2	26.169	48.9835	5.50357
143-5-135	2892		4.24	77.03	5.26	2.29	0.84	2.19	0.44	1.45	0.27	0.081	0.008	0.6	9.82	23.4161	1.61609	0	369250	5.82346	1527.36	234.008	43.3175	45.2955	65.9195	16.5971	131.213	64.838	111.602	8.32451	0.809571	64.7666	88.8908	89.8598	26.5735	79.9066	7.89672	59.4365	0.000141908	0	0.630127	1.27016	0	3.26779	1015.06	1049.89	22.556	41.7264	5.0209
143-5-135-1	2892.36		4.12	77.39	4.88	1.94	0.99	2.73	0.39	1.4	0.27	0.068	0.011	0.54	9.94	22.8056	1.53968	0	377503	5.43512	1550.84	183.44	37.5496	38.8307	89.6326	15.6591	103.177	49.8507	107.608	7.86733	0.733467	61.1202	99.6852	100.891	25.1271	93.1223	6.76132	49.4162	0.000142073	0	0.516672	1.07359	0	3.02446	1079.02	1110.98	24.2796	44.8666	5.01156
143-5-137	2892.56		5.85	64.86	10.7	3.61	1.41	1.83	0.67	3.02	0.71	0.15	0.013	0.9	12.64	22.2985	3.88854	0	323271	9.03138	4116	309.247	58.1046	60.2239	104.995	17.7735	140.424	69.9743	217.638	18.8147	1.12666	128.986	115.26	116.548	44.2086	160.209	19.0989	64.8212	0.000277111	0	0.909233	3.30548	0	6.78159	1650.96	1631.86	91.006	160.352	16.317
143-5-139	2892.97		4.11	74.76	6.91	3.37	0.98	1.28	0.58	1.86	0.36	0.11	0.009	0.58	9.68	19.8132	2.08935	0	373576	7.42483	2035.01	406.535	56.0344	58.9043	68.4428	19.8195	160.539	109.775	144.98	10.5796	0.83115	85.29	73.9772	69.5844	31.4841	99.7314	10.362	60.6058	0.000325436	0	0.785745	1.70935	0	4.13239	1101.89	1140.45	29.0761	53.1218	6.35697
143-5-141	2893.2		4.11	72.72	7.95	3.84	1.04	1.16	0.67	2.16	0.38	0.12	0.009	0.76	10.24	19.5198	2.22195	0	341854	8.04081	2135.06	504.068	63.6331	67.2596	70.7352	25.9565	157.774	142.042	337.225	11.6294	0.8879	93.7171	77.0954	72.6926	34.2443	87.5555	10.4203	57.2987	0.000324986	0	1.74218	1.80205	0	4.43516	1237.07	1280.85	30.6717	56.0076	6.75045
143-5-143	2893.3		4.73	72.79	8.29	3.35	1.02	1.05	0.69	2.21	0.41	0.12	0.009	0.6	10.04	23.9705	2.71642	0	316022	9.08318	2332.22	408.734	58.5775	61.528	76.9668	18.3405	156.581	106.491	161.659	13.2872	0.901736	101.221	76.8751	73.8434	35.5386	106.176	11.3216	76.9956	0.00015235	0	0.843152	1.89514	0	5.19311	1186.9	1221.47	32.7353	60.5744	7.17148
143-5-145	2893.52		3.61	71.46	10.14	2.78	1.09	1.31	0.71	2.8	0.4	0.12	0.008	0.64	9.3	23.426	3.26006	0	295531	8.31327	2160.78	405.436	54.4414	57.9675	61.8737	16.7534	128.982	63.8694	301.994	15.1809	0.968616	121.114	99.74	95.3541	32.3033	120.209	12.6845	71.3828	0.000297757	0	1.17302	3.96717	0	5.93155	1641.75	1625.47	42.277	88.3632	9.98826
143-5-147	2893.91		4.31	76.77	6.76	2.66	0.98	1.2	0.6	1.77	0.34	0.1	0.013	0.46	8.68	22.5268	2.09348	0	338136	7.04588	1978.68	418.448	48.6054	50.1398	103.976	18.0965	140.516	98.3733	415.947	10.299	0.76525	78.3756	70.5524	68.2864	23.3831	97.4126	13.0607	54.7718	0.00016179	0	1.60797	1.54538	0	3.90745	998.989	1067.1	27.0956	47.119	5.40864
143-5-149	2894.26		4.46	73.98	8.06	2.69	1.19	1.29	0.55	1.94	0.38	0.11	0.015	0.72	9.42	24.3352	2.45087	0	334976	8.56742	2220.92	793.586	68.1272	71.6068	119.024	18.7928	154.807	233.597	601.593	11.6829	0.889806	99.8044	102.298	99.3071	28.9623	112.181	13.4189	53.8822	0.000268191	0	3.06971	1.90596	0	4.50027	1225.45	1268.96	27.7721	48.1098	6.02761
143-5-151	2894.75		4.93	74.35	9.33	1.81	1.06	0.6	0.69	2.51	0.44	0.11	0.009	0.72	8.84	21.4714	2.68547	0	285960	8.95553	2490.06	1001.81	83.4138	85.1751	63.7326	11.2445	98.5264	157.138	309.927	13.7476	0.773285	110.008	65.2746	61.6313	32.8793	141.013	18.8315	24.742	0.000222619	0	1.79435	2.13557	0	4.99567	1325.01	1327.28	39.5976	66.0034	7.64174
143-5-153	2895.55		2.66	86.16	3.48	1.48	0.73	1.14	0.29	0.88	0.17	0.048	0.017	0.24	5.66	30.0461	0.859791	0	290872	3.93417	850.676	186.828	22.7919	24.4084	134.489	19.7196	50.5006	43.4501	173.798	4.96924	0.656963	39.4437	58.0461	55.0533	16.3301	66.636	5.77066	21.6249	5.98972e-05	0	0.694912	0.775634	0	1.91438	889.208	908.07	14.5641	27.4539	3.35032
143-5-155	2895.96		4.34	72.03	9.42	2.26	1.49	1.41	0.66	2.59	0.46	0.11	0.025	0.66	9.4	34.1919	2.48084	0	291443	11.2816	2674.28	208.983	86.0638	89.9389	205.646	8.69822	64.4534	121.042	226.945	13.3864	0.981711	117.201	85.5414	79.6953	22.7707	132.285	11.2206	1.18241	0.000122549	0	0.236298	2.32961	0	6.46981	1417.78	1400.71	29.0116	48.6162	5.48441
143-5-156-1	2896.51		2.97	73.21	6.32	1.47	0.88	5.49	0.46	1.67	0.31	3.5	0.018	0.44	6.32	32.7555	1.78502	0	277584	7.7695	1761.95	116.194	62.5599	65.8404	147.25	8.09765	36.3725	103.2	170.872	10.1353	1.2857	77.9271	260.501	255.169	133.145	93.6953	7.8584	0.488093	0.000347914	0	0.142417	1.57382	0	3.98577	1105.57	1155.54	79.7835	180.973	26.5619
143-5-158	2896.97		2.6	61.79	12.8	3.96	2.62	2.97	0.82	3.42	0.69	0.095	0.049	0.66	10.34	38.8625	3.60676	0	233027	14.1612	3941.53	188.382	89.9121	93.3837	399.611	14.3896	82.5523	139.965	262.611	18.3644	1.21377	175.09	122.674	122.834	36.0987	182.173	27.3741	5.24332	0.000301453	0	0.275222	3.54905	0	9.25036	1648.95	1612.09	50.8613	101.551	11.3582
143-5-160	2897.4		3.79	58.66	14.45	3.41	2.21	3.45	1.02	3.84	0.71	0.13	0.035	0.96	11.58	34.1376	3.53986	0	210885	15.5612	4027.72	279.413	120.327	118.102	279.297	15.0901	109.711	234.449	320.635	18.189	1.25075	186.743	142.139	142.783	35.0022	150.441	16.1376	3.94657	0.000450999	0	0.0905965	3.10584	0	10.9938	1653.63	1682.87	44.0802	74.8162	8.63575
143-5-162	2898.01		0.31	62.23	16.11	4.02	2.24	2.15	1.01	4.47	0.79	0.084	0.028	0.7	6.72	43.6361	3.45898	0	254894	16.9263	4612.63	94.1957	81.0477	84.0632	231.323	18.3996	61.3749	76.527	69.9715	22.3798	1.24317	228.055	137.921	135.665	32.1517	180.464	19.2826	0.705965	0.000290153	0	0.0389571	3.81398	0	12.0728	1898.48	1887.12	50.8285	114.742	11.0217
143-5-164	2898.51		0.17	63.62	16.26	3.04	1.83	1.98	1.08	4.69	0.76	0.16	0.022	0.82	6.16	35.8829	3.35556	0	230460	14.4544	4313.25	80.8807	62.3728	65.0388	177.017	9.40979	34.2558	112.777	123.036	24.5279	1.24321	226.238	143.872	146.066	39.6818	265.459	34.5201	0.642195	0.000509394	0	0.0645185	4.23454	0	12.0643	2100.74	2055.68	75.956	167.175	15.0493
143-5-165	2898.56	Jiancaogou Formation	0.1	60.8	18.25	3.08	2.01	1.66	1.01	4.97	0.85	0.081	0.034	1.08	6.74	34.1071	4.01042	0	277382	14.8356	5067.28	81.4347	61.1037	63.6204	278.598	8.98172	35.8023	69.2748	229.929	25.4692	1.41046	252.872	149.589	150.044	42.4371	333.911	60.5744	0.484239	0.000410907	0	0.110234	4.68002	0	13.9238	2412.04	2358.36	71.1336	162.553	14.7832
143-5-166	2899.01		0.05	14.3	3.4	7.33	11.24	25.73	0.16	0.9	0.2	0.059	0.48	0.26	35.6	10.3391	1.94828	0	87860.2	4.01413	1045.24	23.2835	22.0745	22.8375	3817.12	6.46978	16.3474	14.7225	23.5669	5.22791	0.775711	46.0205	363.846	360.587	13.7655	68.7092	5.86668	0.198419	0.000502629	0	0.0170821	0.8289	0	2.062	1632.81	1612.05	14.6655	32.9098	3.15056
[truncated: 28 more columns]

## Sheet: 102 samples of Wufeng Fm.
Samples	Depth (m)	Description	Volcanic ash layers	TOC (%)	Main elements (wt %)												Trace elements (ppm)
					SiO2	Al2O3	TFe2O3	MgO	CaO	Na2O	K2O	TiO2	P2O5	MnO	H2O-	LOI	Li	Be	Sc	V	Cr	Co	Ni	Cu	Zn	Ga	Rb	Sr	Y	Zr	Nb	Sn	Cs	Ba	La	Ce	Pr	Nd	Sm	Eu	Gd	Tb	Dy	Ho	Er	Tm	Yb	Lu	Hf
J143-5-1	2867.06	Upper Longmaxi Formation		3.99	64.6	11.99	4.38	1.63	2.07	0.86	3.35	0.6	0.11	0.021	0.6	9.88	27.0403	2.81588	11.6801	184.54	66.5634	22.6298	99.4757	73.1525	132.582	17.1263	160.549	133.08	27.2723	115.546	13.6226	2.68508	10.0601	1748.31	40.0974	74.507	8.65448	32.9978	6.39113	1.15464	5.1923	0.781582	4.66055	0.965859	2.58801	0.395796	2.40785	0.365107	3.07035
J143-5-2	2870.41			2.22	59.45	11.75	4.12	1.77	5.68	0.99	3.14	0.65	0.13	0.027	0.6	11.6	25.7973	2.59019	10.6598	221.34	67.5909	21.4447	102.363	51.0829	128.115	16.9291	152.175	202.92	29.8251	158.31	15.0509	2.89759	9.17632	1625.16	41.0459	76.0825	8.78253	32.6377	6.31421	1.21367	5.30181	0.823997	4.98876	0.993952	2.6937	0.404593	2.64255	0.380381	4.26583
J143-5-3	2870.61			2.4	62	12.25	4.39	2.01	2.98	0.87	3.35	0.61	0.12	0.029	0.46	10.72	27.4236	3.06311	12.0979	231.214	69.0712	21.7723	110.592	65.4571	140.807	17.8234	163.677	156.874	31.5779	141.495	14.7877	2.88726	9.90973	1799	42.9412	79.153	9.19535	35.5656	7.20352	1.25006	5.87809	0.891436	5.49436	1.05553	2.89348	0.437919	2.81003	0.400598	3.48748
J143-5-4	2872.76			2.69	60.53	11.21	4.35	2.12	4.85	1.01	3	0.62	0.13	0.035	0.32	11.74	26.1028	2.624	10.5651	334.239	69.1782	19.9054	113.753	58.0289	201.542	16.3709	144.6	193.135	30.1745	156.463	14.4457	2.60054	8.23395	1612.11	39.994	74.9104	8.6763	33.3177	6.74501	1.21594	5.4199	0.827125	5.06544	0.986794	2.75521	0.397562	2.65083	0.396079	4.2135
J143-5-5	2875.76			3.08	64.61	10.18	3.6	1.81	4.42	0.87	2.7	0.53	0.11	0.028	0.42	10.8	24.7357	2.3394	9.35024	192.722	59.0335	20.3175	100.118	47.6957	103.701	14.6984	131.395	172.621	24.6279	115.941	12.2641	2.4213	7.5871	1574.26	34.5407	63.0638	7.36101	27.764	5.48478	1.0234	4.55079	0.684854	4.17972	0.828681	2.36674	0.333099	2.2416	0.328358	3.119
J143-5-6	2880.26			3.37	56.05	8.14	13.56	0.96	2.26	0.64	2.14	0.41	0.11	0.012	0.78	15.22	16.7822	2.06163	7.53639	159.645	44.3158	28.4898	91.5615	76.7043	74.332	11.7417	98.4774	112.411	23.506	90.7727	10.6533	1.92881	5.39781	1410.65	28.7071	54.824	6.47457	25.099	5.02816	0.942011	4.2525	0.654957	3.91844	0.773436	2.14184	0.296692	1.93377	0.293662	2.41111
J143-5-8	2889.17	Lower Longmaxi Formation		5.47	70.23	8.37	2.72	1.26	2.33	0.8	2.34	0.42	0.086	0.013	0.58	10.8	18.7441	2.48742	8.02043	306.874	47.4982	23.1287	137.301	54.7966	173.399	12.3106	103.105	122.432	27.4544	99.2538	10.1258	1.79444	5.58354	1432.63	29.3865	54.908	6.57582	25.3553	4.88044	0.996363	4.66145	0.706559	4.3876	0.845498	2.45246	0.370514	2.16985	0.34871	2.56707
J143-5-9	2889.24			6.13	70.25	8.12	2.81	1.26	2.41	0.78	2.23	0.41	0.09	0.014	0.68	10.94	18.9169	2.55506	7.76146	305.462	48.415	23.1494	146.672	51.9761	181.715	12.0261	100.589	122.272	29.0616	95.4457	10.1738	1.74018	5.49905	1407.7	29.8625	54.7768	6.70053	25.9651	5.12034	1.0474	4.81775	0.728337	4.56953	0.886693	2.59351	0.372984	2.27882	0.339882	2.44284
J143-5-10	2889.35			6.05	66.95	8.66	3.67	1.51	2.96	0.88	2.38	0.44	0.095	0.017	0.54	12.1	17.1447	2.73408	8.3837	330.902	49.0139	22.586	158.591	57.0134	176.34	12.7639	106.681	138.883	31.9169	111.018	11.308	1.91282	5.77604	1459.46	32.3967	59.6896	7.27721	27.9852	5.5521	1.15325	5.20371	0.823854	4.88581	0.970478	2.84377	0.413977	2.57568	0.386706	2.92646
J143-5-11	2889.43			5.66	59.54	11.84	4.85	1.86	3.24	1.11	2.98	0.55	0.11	0.021	0.54	13.26	19.6642	3.65917	10.1983	546.696	72.3473	20.8839	201.061	78.2822	196.761	18.1367	144.825	161.618	32.6498	133.584	13.7768	2.73792	8.32009	1839.09	38.3804	69.7231	8.25456	31.8772	6.05647	1.17981	5.26682	0.827408	4.82187	0.998576	2.80756	0.399995	2.76131	0.405865	3.45659
J143-5-12	2889.51			5.28	62.83	10.86	4.07	1.51	3.13	1.09	2.99	0.55	0.12	0.016	0.6	12.26	19.2036	3.46727	9.99267	477.309	67.5894	27.7727	196.806	69.7801	275.356	16.9254	137.282	148.92	34.6604	140.17	14.1749	2.49508	7.72685	1609.77	38.5142	70.2293	8.35186	32.5718	6.52274	1.32952	5.99995	0.936426	5.23781	1.10652	3.00047	0.421555	2.8687	0.429316	3.43126
J143-5-13	2889.53			5.98	60.91	10.15	4.81	1.74	3.39	1.09	2.8	0.53	0.12	0.018	1	13.84	18.0483	3.10399	10.2295	436.785	72.4455	36.9013	221.578	81.0123	325.494	15.9848	129.964	154.708	35.7638	138.141	13.4447	2.6433	7.29833	1536.17	36.8645	68.1496	8.3299	32.7756	6.55808	1.31475	6.08188	0.927435	5.50441	1.14478	3.12141	0.440684	2.94486	0.423029	3.44754
J143-5-14	2889.68			6.06	67.02	9.36	3.09	1.38	2.77	0.96	2.58	0.48	0.1	0.016	0.72	11.6	18.1153	3.04767	8.68782	333.538	59.7206	28.0558	143.734	54.3649	135.19	13.6858	114.765	130.902	32.4127	120.851	12.4425	2.01556	6.3998	1479.83	33.9317	63.0197	7.51082	29.042	5.56591	1.1615	5.40665	0.833106	4.90412	0.976332	2.76186	0.405805	2.58566	0.3791	3.1039
J143-5-15	2889.74			6.15	50.79	9.23	14.97	1.41	2.84	0.92	2.51	0.48	0.11	0.016	0.36	16.12	15.5757	3.03129	8.66085	342.821	56.5092	25.6323	287.736	94.0356	415.628	14.1669	117.085	133.269	31.5615	117.112	12.8434	2.26826	6.54153	1462.53	32.7359	60.7323	7.30773	28.8336	5.91813	1.13678	5.20644	0.797778	4.76496	0.973939	2.68863	0.383329	2.56513	0.363033	2.8562
J143-5-16	2889.83			7.21	60.37	9.4	7.27	1.53	2.87	0.99	2.48	0.46	0.1	0.018	0.56	13.9	17.1605	2.79036	8.55889	324.011	58.4818	37.4977	269.557	70.834	259.816	14.0199	116.099	139.283	32.2312	121.376	12.9899	2.34447	6.3093	1693.66	33.3259	61.9212	7.43238	28.2853	5.69532	1.21178	5.18978	0.819906	4.93324	1.01704	2.82329	0.380877	2.7101	0.38291	2.94959
J143-5-17	2889.93			6.65	60.59	8.63	5.01	2.9	3.45	1.07	2.69	0.51	0.12	0.022	0.78	14.32	17.2679	3.07733	9.40439	351.294	57.9031	28.3541	241.882	66.5959	226.453	15.0891	125.393	153.804	38.9884	141.459	15.0198	2.3008	6.74726	1475.48	37.9615	71.6282	8.73996	33.7628	6.97744	1.40231	6.42806	1.01214	5.91186	1.20329	3.37823	0.454826	3.12206	0.454973	3.479
J143-5-18	2889.95			6.7	59.56	12.83	4.43	1.94	1.61	1.48	3.43	0.62	0.14	0.014	0.74	13.32	20.4226	3.98548	10.8116	649.931	75.9578	24.079	252.996	69.0073	318.555	19.5633	158.503	133.28	47.3738	186.422	17.3716	2.83015	9.70662	1866.02	45.8545	85.1256	10.4007	40.8448	8.10612	1.59001	7.51504	1.21122	7.19409	1.53996	4.1866	0.574678	4.0633	0.607224	5.09387
J143-5-19	2890			5.72	59.46	12.56	4.4	1.58	2.26	1.47	3.36	0.64	0.14	0.016	1.02	13.78	19.7196	4.12928	10.8021	640.208	73.9385	29.9338	243.236	67.5317	309.099	18.8036	153.646	186.916	47.5831	184.607	16.5405	2.85033	8.74681	1816.52	44.2877	82.7169	10.242	39.5927	8.04834	1.64544	7.45478	1.17302	7.10985	1.45471	4.12463	0.576402	4.06884	0.578867	4.90034
J143-5-20	2890.11			5.89	59.64	11.82	4.45	1.77	2.52	1.45	3.3	0.59	0.13	0.019	0.98	13.68	20.2644	3.90598	11.0641	611.628	75.4501	29.7557	250.414	72.7916	330.55	18.7473	151.439	145.965	45.5573	160.734	16.1598	2.66961	8.63488	1632.64	45.8262	83.859	10.1213	39.2623	7.78527	1.54072	7.44906	1.15208	6.74145	1.43606	4.03152	0.516759	3.73667	0.542459	3.95148
J143-5-21	2890.2			6	63.05	10.73	3.96	1.33	1.76	1.16	2.69	0.57	0.12	0.013	1.38	13.92	19.1685	3.14648	9.88197	617.985	91.9365	41.574	245.744	73.432	384.624	16.8336	136.813	118.919	42.1554	154.295	14.9209	2.45571	7.75301	1475.29	40.5338	74.7686	9.29857	35.5699	7.32375	1.47513	6.63851	1.06816	6.49407	1.3102	3.66277	0.480674	3.53531	0.497083	3.68144
J143-5-22	2890.35			6.88	61.8	11.17	3.71	1.46	2.03	1.33	2.89	0.59	0.13	0.015	1.32	14.24	19.1617	3.38167	10.2845	709.234	86.4195	34.2239	252.388	79.5622	445.085	17.5888	140.118	129.854	47.0405	163.868	15.01	2.58985	8.118	1527.61	44.0161	81.0643	9.91525	39.1344	8.04812	1.58176	7.63627	1.18132	7.04509	1.45512	4.02767	0.529837	3.83395	0.536657	3.94111
J143-5-23	2890.44			6.97	65.04	9.99	3.43	1.24	1.68	1.21	2.72	0.54	0.12	0.012	0.88	13.38	18.4315	2.82918	9.33511	669.14	74.2456	28.8027	249.677	77.5504	347.093	15.7359	128.91	117.53	41.1689	148.675	13.5781	2.41116	7.33347	1436.07	40.0384	73.9974	9.07236	35.3468	7.00116	1.41495	6.62074	1.03652	6.38902	1.31366	3.58956	0.475878	3.3321	0.475303	3.7224
J143-5-24	2890.55			7.28	66.93	10.07	3.15	1.28	1.77	1.24	2.68	0.54	0.12	0.013	0.7	11.6	19.0204	2.9512	9.18141	677.521	77.253	21.659	209.873	97.0024	404.287	15.8104	124.337	118.138	35.0812	143.577	12.5507	2.31586	7.0688	1389.95	36.7093	68.3711	8.46766	32.5296	6.55694	1.23627	6.08239	0.920428	5.68428	1.08845	3.07389	0.406367	2.78392	0.412839	3.70772
J143-5-25	2891.13	Wufeng Formation		1.6	69.61	8	1.22	1	6.17	0.68	2.25	0.39	0.12	0.021	0.92	10.32	21.6849	2.56136	7.26354	102.334	53.8909	23.1954	55.1321	39.54	78.6056	11.4775	100.103	225.507	14.5633	111.646	9.53903	1.77017	5.77326	1412.87	25.6609	42.8898	4.69925	15.8312	2.51908	0.459721	2.19862	0.367374	2.20518	0.43523	1.43049	0.210908	1.52288	0.245423	3.17421
J143-5-26	2891.35			0.8	32.84	4.61	3.63	9.27	18	0.45	1.34	0.25	0.48	0.21	0.64	28.38	12.8645	1.70267	4.36626	62.7396	32.0779	18.8163	48.8814	20.7442	104.503	6.96144	56.7613	396.55	24.7577	98.558	6.78865	1.23539	3.19542	900.273	21.4566	35.6877	4.37875	17.2531	3.47685	0.877541	3.58672	0.547073	3.24912	0.67282	1.95947	0.287241	1.77656	0.280717	2.64666
J143-5-27	2891.43			5.28	25.88	4.13	4.13	10.66	19.88	0.42	1.16	0.23	0.21	0.25	0.48	31.84	10.3245	1.44731	4.46784	68.0292	28.8934	19.5071	58.7441	32.0829	74.7892	6.4635	51.5202	417.465	22.2184	72.4281	5.92223	1.16148	2.8365	759.541	19.7145	30.6274	3.55342	13.5629	2.68928	0.615953	2.74339	0.425758	2.68589	0.589593	1.87087	0.260205	1.79432	0.278707	1.96655
J143-5-28	2891.53		V16	3.08	57.54	8.92	5.22	1.61	4.72	1.31	2.27	0.44	0.2	0.026	0.82	17.2	15.9357	2.63544	9.15116	168.67	55.6645	40.9361	81.006	112.128	51.3857	13.6394	105.83	185.087	51.7936	118.528	11.4587	2.06852	6.17938	1026.52	41.2222	81.2662	9.08083	36.6866	7.35107	1.4694	7.66854	1.15203	7.32772	1.48276	4.24909	0.582285	3.77613	0.540661	2.80597
J143-5-29	2891.55			6.23	61.13	6.69	6.07	1.63	4.85	0.66	1.9	0.35	0.17	0.019	0.5	16.24	15.4056	2.0515	6.93099	179.315	40.0583	26.508	139.989	136.796	195.086	10.6967	83.9472	162.994	34.2854	90.7613	8.74161	1.79534	4.65397	1031.86	27.6935	52.5051	6.12505	24.4635	5.02423	1.0281	5.14931	0.797118	4.89981	1.00288	2.88625	0.384665	2.68639	0.386203	2.18237
J143-5-30	2891.57			5.59	58.38	9.37	3.25	1.86	6.5	0.9	2.52	0.46	0.15	0.022	0.64	16.12	18.908	2.94192	9.539	385.338	69.3148	21.4639	174.391	93.7201	164.39	14.7522	117.672	216.405	45.0666	138.918	11.8808	2.13698	6.70232	1338.82	39.0871	72.633	8.60464	33.7515	7.0567	1.35529	7.00866	1.12722	6.87359	1.38187	3.90386	0.580328	3.60193	0.535208	3.44973
J143-5-31	2891.8			5.22	67.57	7.6	2.71	1.96	3.76	0.67	2.16	0.41	0.11	0.013	0.6	13.1	20.1394	2.5839	8.2082	299.248	64.1326	33.7483	151.142	62.5472	161.339	12.2968	97.0973	146.711	35.3621	128.024	9.64078	1.66987	5.30677	1240.21	32.2277	59.2503	6.99646	26.8722	5.19662	1.01391	5.14316	0.887359	5.31557	1.06758	3.25471	0.483862	3.20264	0.478649	3.35122
J143-5-32	2891.81		V15	2.98	71.22	7.4	2.52	1.03	2.39	0.62	2.2	0.44	0.11	0.009	0.4	11.82	19.7477	2.31055	8.08531	268.805	54.3183	19.4106	132.741	44.5778	172.642	12.1895	93.6851	106.135	32.7837	101.906	8.81665	1.77068	5.07182	1320.99	29.337	54.787	6.36341	24.4038	4.96728	0.826296	5.10375	0.867247	5.28745	1.05546	2.94769	0.39622	2.63445	0.383311	2.61151
J143-5-33	2891.82			5.29	42.04	9.63	20.65	1.04	2.53	0.79	2.53	1.44	0.31	0.019	0.38	18.38	13.09	2.9338	9.52041	465.558	52.4055	30.6502	220.507	173.002	301.462	15.3356	113.623	158.726	60.9646	133.381	54.8895	2.20047	5.57895	1743.68	45.9609	92.0148	11.4503	48.1489	10.8874	2.00729	11.2334	1.67629	9.8078	1.86893	5.10192	0.637096	4.22159	0.594175	3.38373
J143-5-34	2891.83			5.84	70.79	7.05	2.3	1.14	3.09	0.55	2.05	0.39	0.095	0.01	0.44	12.08	20.2596	2.35289	7.47154	253.782	53.8916	28.559	124.972	49.0337	174.547	11.4145	91.3198	122.797	31.3903	98.0652	8.58965	1.72552	4.85642	1179.57	29.2621	54.6029	6.26122	24.5237	4.77097	0.867716	4.76669	0.754443	5.0298	0.998196	2.88356	0.391999	2.64461	0.378459	2.6142
J143-5-35	2891.94			4.22	50.57	29.61	1.18	2.01	0.12	0.61	7.15	0.25	0.032	0.001	1.58	7.8	15.5795	7.57865	14.2119	435.479	3.41042	3.52613	22.7798	38.1021	118.549	35.6704	206.809	107.746	15.2628	127.597	4.21045	12.9658	18.1514	5284.4	8.80469	29.8662	4.27367	18.3427	4.5261	0.480904	3.45367	0.549336	3.06461	0.588346	1.76185	0.278776	1.96072	0.310123	10.9863
J143-5-36	2892.31		V14	2.1	48.7	21.76	4.72	1.77	1.86	1.09	5.33	2.85	0.43	0.019	1.24	10.78	19.3646	6.68303	14.5228	594.605	33.538	27.677	132.929	151.675	266.378	31.5425	192.179	250.505	95.3808	384.378	266.802	3.23729	12.0091	4184.62	150.323	311.633	36.732	139.715	26.3285	5.58722	20.7551	2.76493	15.2452	2.9879	8.57111	1.15325	7.63789	1.09968	10.9661
J143-5-37	2892.33			4.12	61.07	11.81	4.48	1.63	3.13	0.89	3.2	0.96	0.17	0.019	0.44	12.04	19.0108	4.14734	10.5867	432.274	71.1605	30.9679	169.583	128.445	224.998	19.3586	140.355	161.015	46.3441	197.035	43.7024	2.75669	7.31393	1866.02	63.5264	116.246	12.9024	46.6973	8.42973	1.7858	7.71659	1.21546	7.4016	1.40337	4.04533	0.53078	3.65084	0.542142	4.71893
J143-5-38	2892.37		V13	2.48	75.48	5.8	2.2	1.21	2.72	0.45	1.65	0.29	0.075	0.012	0.26	9.8	20.7047	1.91097	5.64906	194.628	39.627	22.9901	109.49	63.3349	121.409	9.61947	71.9474	105.359	22.774	98.2649	7.56405	1.27887	3.57903	1208.07	25.7023	46.9345	5.28212	19.1268	3.5758	0.785265	3.44819	0.564555	3.54339	0.725547	2.0517	0.282439	1.82146	0.278624	2.55777
J143-5-39	2892.54		V11	2.33	67.45	10.42	3.8	1.16	1.26	0.66	2.88	0.72	0.18	0.01	0.62	10.98	20.1917	3.26157	8.78378	333.825	57.0514	27.9523	141.735	81.0109	139.259	18.6413	124.962	107.973	45.5214	154.982	24.3565	3.41421	6.27634	1958.29	85.5362	171.483	20.1361	77.8163	15.314	2.41681	11.2232	1.59981	8.68797	1.58001	4.35021	0.564755	3.79993	0.524691	4.08606
J143-5-40	2892.6			5.58	63.29	11.39	4.02	1.39	2.16	0.7	3.07	0.82	0.2	0.017	0.52	12.38	20.7416	4.12285	8.94217	335.321	61.5291	23.9425	156.355	93.5611	238.22	20.9176	137.224	145.502	48.9891	170.29	24.0451	3.71434	7.40724	1811.94	95.1727	169.908	18.7214	67.9647	13.3643	2.17548	10.7977	1.67256	9.59029	1.78875	4.88764	0.625944	4.07341	0.562011	5.18258
J143-5-41	2892.85		V9	2.21	52.12	12.69	12.63	1.19	1.43	0.76	3.47	1.12	0.22	0.014	0.54	13.72	17.3658	4.15844	10.7863	683.208	75.5323	26.2466	127.109	64.9534	194.052	20.5865	157.652	108.178	36.026	159.54	28.1949	2.56514	7.32772	1983.23	54.9042	103.6	12.155	44.8795	8.13238	1.36857	6.37758	0.945994	5.73563	1.14982	3.24163	0.456026	3.05412	0.438978	3.33418
J143-5-42	2892.86			4.33	76.23	5.85	3.05	0.96	1.49	0.44	1.59	0.32	0.095	0.008	0.36	9.58	14.203	3.72403	10.4682	725.176	63.4539	27.3972	210.229	150.051	420.356	19.9929	153.385	135.218	41.0201	168.005	60.1888	2.46171	6.66779	2206.9	54.0668	102.765	12.1272	45.6249	9.18137	1.70016	7.76323	1.19137	6.69213	1.31465	3.64782	0.503395	3.32065	0.497978	3.63566
J143-5-43	2892.96			4.15	63.42	12.84	4.22	1.5	1.44	0.85	3.51	0.81	0.14	0.006	0.84	10.58	18.2021	1.90418	6.28235	328.098	51.5184	29.0561	146.113	89.9727	123.448	9.5472	75.5088	75.2817	25.8863	97.7336	9.63409	1.41882	3.59875	1123.97	26.2406	48.0777	5.90682	22.4438	4.53044	0.872666	4.2449	0.688147	4.17278	0.811388	2.32746	0.314748	2.08902	0.310274	2.0467
J143-5-44	2893.06			4.11	78.91	5.25	2.55	0.95	1.39	0.43	1.45	0.25	0.097	0.01	0.28	8.28	21.2156	1.52113	5.57427	313.438	38.5328	20.5084	117.031	98.2274	227.907	8.50169	66.3375	69.2065	25.74	66.0595	7.08182	1.38905	2.87607	1116.45	20.8805	38.3236	4.72168	18.3543	3.95579	0.798909	3.93391	0.65746	3.82402	0.812028	2.30047	0.315549	2.08599	0.315177	1.63011
J143-5-45	2893.26			4.73	75.13	6.19	1.66	0.95	3.98	0.49	1.69	0.3	0.1	0.013	0.36	7.68	22.2869	1.71824	6.3802	171.048	42.637	19.6712	88.2805	46.533	77.4259	9.65045	79.6483	153.986	22.2637	91.8917	8.166	1.45951	4.09834	1226.84	23.6047	41.217	4.911	18.0828	3.55861	0.698218	3.47886	0.578867	3.29319	0.71603	2.05383	0.291054	1.9875	0.289564	2.21542
J143-5-46	2893.66			3.61	75.99	6.37	2.58	2.37	2.12	0.52	1.67	0.32	0.088	0.016	0.36	7.96	21.5444	1.99648	6.84349	359.647	48.2713	19.2475	128.21	65.8168	217.971	10.0728	77.8943	90.0847	32.8464	115.618	12.6978	1.57883	3.84289	1040.84	27.8174	49.3576	5.89588	22.7762	4.50037	0.890166	4.56993	0.7659	4.71006	1.0218	2.9799	0.412551	2.84864	0.413992	2.29531
J143-5-47	2893.71			3.55	71.02	7.87	3.51	1.35	2.14	0.62	1.97	0.4	0.11	0.02	0.72	10.5	20.501	2.45401	8.93935	470.415	55.3939	31.0019	157.118	86.0833	441.553	12.5629	94.7232	96.9824	45.2413	174.852	16.3798	1.95108	4.5707	1227.09	35.8169	63.5721	7.48808	29.148	6.14156	1.22255	6.15171	1.02208	6.37204	1.3695	3.97329	0.598436	3.84635	0.595747	3.58924
J143-5-48	2893.83		V8	1.33	53.21	19.26	7.17	1.68	0.68	0.66	4.91	0.84	0.12	0.013	1.14	10.88	20.6275	6.43079	11.5507	1559.72	49.0939	27.8632	216.067	148.149	393.705	26.4784	187.881	124.595	36.3889	204.904	42.9957	3.14982	10.4296	3094.49	68.3368	114.987	11.2009	34.5282	5.53098	1.01427	4.81585	0.85894	5.29544	1.15444	3.55835	0.549271	4.05911	0.608304	8.85525
J143-5-49	2893.84			4.65	62.77	13.73	3.9	1.71	1.44	0.86	3.69	0.58	0.13	0.013	0.94	10.54	23.6709	4.2977	11.4932	866.997	70.4962	26.373	172.043	68.7082	465.605	22.0477	162.857	124.682	35.224	177.981	23.0228	3.09457	8.21625	1943.02	73.0044	127.167	12.7736	41.5166	6.57913	1.17229	5.65043	0.89568	5.34746	1.13593	3.3247	0.476286	3.4192	0.514318	4.9502
J143-5-50	2894.23			4.55	71.33	6.73	2.66	1.66	3.77	0.42	1.79	0.36	0.063	0.02	0.4	11.02	19.598	2.00555	6.53146	376.368	51.41	18.4306	117.997	78.831	140.399	11.0845	84.3769	138.358	25.1333	114.895	9.77291	1.78483	4.02705	1294.69	24.4826	44.3109	5.15601	18.8366	3.7278	0.819674	3.75961	0.646095	3.73133	0.804963	2.20007	0.32076	2.06889	0.316209	2.59956
J143-5-51	2894.27			4.46	76.81	6.76	1.34	0.9	2.31	0.42	1.7	0.32	0.081	0.012	0.6	9.24	38.4596	2.04633	6.57369	540.722	54.945	18.6943	77.9655	115.418	201.798	9.81264	83.7679	203.21	26.2647	107.733	10.6153	1.55912	3.72823	1100.73	27.8972	48.5517	6.0661	22.7147	4.59647	0.896598	4.46166	0.718089	4.21986	0.875824	2.41662	0.367894	2.36532	0.350144	2.59511
J143-5-52	2894.4			4.75	51.52	24.84	4.04	1.77	0.4	0.76	6.21	0.91	0.072	0.023	1.72	9.1	17.5238	6.29438	18.5185	606.244	18.1529	22.9886	82.7474	76.4731	153.778	30.1358	215.734	105.812	22.6264	216.411	19.9197	5.8898	13.671	4292.76	17.2975	34.1095	4.5201	17.7632	3.88641	0.573884	3.75425	0.6342	3.84547	0.87033	2.59951	0.412673	2.89966	0.456512	7.5945
J143-5-53	2894.58			4.9	74.94	8.86	1.57	1.01	0.67	0.45	2.36	0.37	0.077	0.007	0.7	9.52	24.4223	2.51685	9.08339	520.864	63.7652	41.434	96.0964	70.0546	108.07	12.8847	111.512	78.5624	30.5492	129.966	11.4124	2.09483	4.21316	1550.46	44.2294	77.6243	9.27967	33.3386	6.02018	0.889616	4.94074	0.835241	4.63659	1.03899	2.81988	0.420723	2.86797	0.44809	3.56635
J143-5-54	2894.6			3.2	72.36	7.15	1.51	0.84	5.63	0.29	1.93	0.27	0.07	0.017	0.58	9.88	37.78	2.01629	6.36225	378.005	28.4816	33.4868	59.1586	48.0645	70.0534	9.29741	84.9867	434.996	14.7088	69.9609	7.09676	1.64308	3.04714	1278.28	24.4929	42.7487	5.04225	18.5675	3.43816	0.835234	3.05805	0.444173	2.50411	0.504397	1.48388	0.229281	1.50945	0.240275	2.63811
J143-5-55	2894.73			4.45	58.57	13.37	7.45	1.24	2.4	0.52	3.49	0.46	0.11	0.011	0.62	12.12	19.7839	3.73366	9.93602	766.516	45.2521	26.6318	149.566	105.356	336.485	18.5394	144.001	219.41	31.508	140.431	18.807	2.80871	6.42183	2141.03	56.682	94.4125	10.2969	36.4177	6.39215	1.2639	5.58772	0.902387	5.10571	1.06132	2.95882	0.440713	3.07701	0.476129	5.26089
J143-5-56	2894.76			4.92	83.78	4.85	1.07	0.64	0.65	0.35	1.29	0.27	0.063	0.009	0.46	7.16	24.0836	1.37851	4.8953	545.562	47.8456	21.7784	66.8879	106.829	227.476	7.27252	58.2928	54.0199	22.5856	92.4875	9.85978	1.04361	2.63769	1025.03	19.4321	33.3898	4.2293	16.739	3.85436	0.676268	3.89474	0.608084	3.68319	0.755314	2.07904	0.29994	1.89065	0.290808	1.87664
J143-5-57	2894.89			4.14	73.03	5.51	1.73	1.13	5.7	0.33	1.46	0.27	0.081	0.018	0.42	11.06	48.1277	1.26603	6.15453	404.271	55.6729	55.0011	91.6791	105.977	449.567	8.5265	69.187	412.83	33.3907	143.826	9.17596	1.43806	2.42675	917.365	24.6119	43.4487	5.55456	22.1287	4.83079	1.09679	5.14541	0.879449	4.99324	1.12067	3.11324	0.475508	3.22912	0.498269	3.27774
J143-5-58	2895.01			4.23	83.51	2.95	2.26	0.61	1.95	0.2	0.83	0.14	0.041	0.015	0.54	7.74	25.7913	0.705726	3.23272	165.794	20.1755	48.4655	89.5195	47.3833	93.9756	4.4935	34.6873	155.785	16.5553	74.399	4.80388	0.792208	1.44781	835.759	12.7493	23.9575	3.076	12.4438	2.68086	0.583326	2.81634	0.471265	2.69691	0.553957	1.524	0.221893	1.49087	0.22833	1.39591
J143-5-59	2895.11			4.38	85	4.2	0.82	0.56	0.57	0.27	1.13	0.2	0.061	0.006	0.38	6.84	25.5949	1.1336	4.25333	462.036	38.7878	29.2302	59.194	93.8316	240.886	6.43398	52.0081	50.1517	26.6408	109.62	8.54776	1.07024	2.31798	970.907	16.88	29.4318	3.90318	15.9432	3.80579	0.653971	4.00112	0.657897	3.98252	0.877748	2.31971	0.323677	2.13583	0.325448	1.8906
J143-5-60	2895.21			4.58	34.9	9.21	3.43	1.01	23.2	0.082	2.85	0.39	0.054	0.05	0.82	19.88	22.0378	2.23921	7.65955	560.713	30.6263	16.9531	84.1083	117.595	197.288	13.3406	128.784	2210.59	26.4392	96.5079	15.8775	1.99114	3.91025	1239.11	24.1122	51.2622	6.78188	28.3092	6.21233	2.30585	5.86206	0.80989	4.4853	0.89456	2.49869	0.351026	2.34789	0.370045	4.22168
J143-5-61	2895.31			4	75.58	7.25	2.26	0.96	0.96	0.5	1.83	0.36	0.1	0.012	0.46	9.62	21.8578	1.91485	8.79751	526.805	61.6592	51.2755	121.696	128.478	489.22	10.9387	86.211	70.1657	47.2483	204.381	12.7046	1.7155	4.02401	1264.75	35.6746	61.5008	7.77388	30.4967	6.53823	1.22996	6.86993	1.16404	7.21658	1.54347	4.59497	0.723857	4.75081	0.74448	4.67236
J143-5-62	2895.41			4.12	55.91	20.55	3.89	1.99	0.44	0.87	5.18	0.92	0.086	0.027	1.36	9.46	19.0906	5.13781	16.5757	569.296	42.545	32.3647	86.9848	75.6967	189.183	25.7246	187.533	89.9374	27.7995	207.143	23.5154	5.13706	11.1804	3433.54	38.21	72.6365	9.33017	35.5937	6.87548	0.954443	5.08825	0.808661	4.75934	1.08803	3.05514	0.49031	3.18349	0.497299	6.52268
J143-5-63	2895.51			3.98	58.56	18.59	3.24	1.54	1.51	0.62	4.8	0.57	0.084	0.027	1.1	9.78	16.6785	4.4143	14.3331	1571.09	46.6587	24.3495	77.5383	317.833	480.436	23.3995	182.542	191.668	18.6913	122.226	16.0847	4.69101	9.09133	3262.02	21.4098	38.3452	4.72496	18.7091	4.18343	0.792255	3.91484	0.614608	3.44189	0.68269	1.93046	0.274126	1.95387	0.306963	4.71249
J143-5-64	2895.6		V7	2.11	59.13	17.95	3.37	1.99	0.8	0.88	4.55	0.63	0.12	0.024	1.08	9.9	30.8894	5.07807	15.4603	178.702	97.6756	19.7308	86.7389	126.189	286.559	26.1684	191.659	113.111	42.692	220.015	22.7751	5.53105	11.2101	2587.97	81.3596	141.599	17.3843	60.9057	10.625	1.48952	7.95406	1.28469	7.46525	1.56699	4.5858	0.684761	4.54969	0.72395	7.01102
J143-5-65	2895.62			3.55	57.26	14.2	3.84	1.58	5.54	0.86	3.74	0.58	0.081	0.029	0.84	12.3	22.3237	3.4953	14.5259	384.481	90.5568	18.3162	82.687	197.308	430.021	21.0503	159.037	488.934	35.4952	199.558	20.9473	4.82483	7.97488	2113.68	69.5985	123.569	14.9884	54.9429	10.3204	2.13668	7.21327	1.07802	6.2705	1.29606	3.77503	0.575442	3.76202	0.585806	4.59641
J143-5-66	2895.68		V6	2.01	40.3	14.23	22.02	1.38	0.55	0.52	3.65	1.01	0.52	0.019	0.54	15.32	20.5302	4.47008	9.84444	258.509	46.8438	29.1218	200.695	87.2193	284.11	21.3863	142.131	80.4946	37.6235	254.419	75.2565	5.29396	9.19596	2185.88	53.1913	97.8436	11.5948	41.7415	7.29401	1.19315	5.42243	0.905706	5.85897	1.31518	3.91071	0.618283	4.33265	0.662656	8.9233
J143-5-67	2895.75			4.11	37.27	17.06	21.63	1.38	0.3	0.48	4.43	1.42	0.63	0.017	0.86	14.7	18.0982	5.42007	10.1542	353.374	30.052	37.8372	235.847	75.285	339.613	25.5665	160.682	79.4268	40.8513	297.528	115.875	6.7582	11.1023	2754.15	47.0655	92.068	11.1101	40.5372	7.57544	1.34178	5.7494	1.00164	6.44822	1.47102	4.60634	0.733048	5.10807	0.755223	11.5565
J143-5-68	2895.78			3.59	64.86	14.45	3.18	1.79	0.92	0.81	3.9	0.71	0.066	0.024	0.6	8.6	30.6453	4.00233	12.0969	271.135	100.536	12.8208	79.7357	129.751	336.261	22.8643	168.773	101.818	33.3803	218.427	36.1379	4.68071	9.55414	2034.08	62.2956	106.783	12.3273	41.6305	6.64147	0.950558	4.70974	0.816161	5.10951	1.13812	3.51805	0.527241	3.57589	0.540478	7.27717
J143-5-69	2895.92			4.22	65.13	11.09	3.21	2.27	2.53	0.62	2.98	0.61	0.14	0.052	0.74	10.78	30.8162	3.13123	14.0284	415.419	118.764	17.2974	67.325	133.082	213.784	17.7066	141.48	95.4123	37.826	209.981	19.9329	3.06352	7.1952	1402.53	36.8478	55.1475	5.9892	19.0856	3.21411	0.682692	3.24059	0.625616	4.55916	1.16024	3.67022	0.610107	4.30568	0.684029	3.397
J143-5-70	2895.96			4.34	73.58	9.64	2.23	1.26	0.88	0.6	2.55	0.44	0.029	0.02	0.48	8.76	31.878	2.54716	10.3432	195.574	74.3911	16.3125	68.1818	104.76	196.562	13.2152	116.886	72.7269	15.5788	125.159	10.1092	2.43445	6.32532	1452.59	25.035	39.8973	4.21211	13.1407	1.80426	0.345692	1.45947	0.288502	2.04893	0.521056	1.78245	0.292559	2.18974	0.345607	3.4214
J143-5-71	2896.01			4.1	63.51	13.94	3.45	2.19	1.87	0.99	3.93	0.7	0.084	0.038	0.58	9.22	34.6818	3.34338	14.3606	162.918	111.253	16.9644	81.6233	192.884	214.01	19.6637	183.461	119.343	34.1408	180.817	19.6854	3.24977	10.6203	1695.57	46.9746	83.8503	10.1532	36.4421	6.81524	1.11382	5.55162	0.940676	5.67387	1.16084	3.55358	0.540516	3.70647	0.583841	4.64211
J143-5-72	2896.06		V5	2.2	76.21	7.76	2.09	1.04	0.87	0.56	2.08	0.37	0.13	0.018	0.46	8.72	29.3337	1.64125	8.17316	544.396	58.1276	22.404	97.4474	141.062	232.07	10.315	95.3172	67.1163	28.2661	114.555	10.7737	1.82035	5.20425	1172.5	22.6044	39.5991	4.82306	17.9519	3.96257	0.828182	3.93524	0.652012	4.25969	0.907249	2.63065	0.391276	2.74528	0.424037	2.34267
J143-5-73	2896.1			3.5	52.78	23.13	4.36	1.74	0.32	0.72	5.87	1.61	0.043	0.031	1.24	8.8	19.803	6.24869	25.9191	408.369	33.5744	20.4571	51.1061	49.497	161.384	28.0053	209.342	98.7228	22.2833	229.987	41.9537	4.46888	14.3581	3940.98	15.1042	24.5292	2.64094	8.18538	1.4659	0.325691	1.52688	0.335686	2.6232	0.709609	2.50749	0.447321	3.34073	0.522642	7.70523
J143-5-74	2896.12		V4	1.2	50.68	24.14	4.59	1.81	0.37	1.13	5.85	1.93	0.057	0.056	1.42	8.72	18.7207	7.61452	20.5162	808.387	38.531	37.0115	81.6477	57.6491	149.737	27.7175	204.973	108.631	20.9569	231.049	28.8266	5.09121	16.3041	3872.89	10.0173	16.6778	1.84398	6.42697	1.51218	0.269203	1.58013	0.346102	2.78591	0.678693	2.36837	0.399565	2.85936	0.404688	7.48607
J143-5-75	2896.2			2.57	55.79	21.39	3.94	1.74	0.43	1.11	5.23	1.42	0.05	0.037	1.02	8.24	22.8314	6.0313	19.5417	631.199	61.7511	29.8126	75.1509	74.0262	247.196	25.8084	197.075	103.931	20.4355	216.984	24.0198	4.75706	14.1996	3228.5	20.3184	32.291	3.30612	10.2923	1.76523	0.300619	1.69821	0.353306	2.81262	0.696825	2.24531	0.368428	2.69161	0.407962	6.57865
J143-5-77	2896.31			3.9	33.4	20.47	21.23	1.25	1.51	0.45	4.72	1.46	0.2	0.017	0.98	15.24	11.0019	4.63653	21.1728	438.173	9.77284	22.5644	95.9276	46.007	87.8334	22.4154	159.954	147.091	50.4344	171.049	30.8983	3.63373	11.6909	3321.87	30.3716	67.3818	9.39479	40.429	10.2626	2.51296	9.9015	1.49849	8.50188	1.63421	4.25019	0.595407	3.74706	0.520042	5.98753
J143-5-78	2896.42		V2	2.31	66.73	11.95	2.89	1.69	2.3	0.55	3.26	0.51	0.025	0.055	0.7	9.54	29.3888	2.8537	17.5039	148.008	59.8238	24.7386	62.1171	121.318	302.351	16.5028	136.59	201.773	18.7399	141.72	12.8021	3.47963	7.45007	1962.04	31.5136	49.6344	5.22931	16.1257	2.48973	0.556982	1.96461	0.379245	2.67805	0.63243	2.11676	0.368253	2.62925	0.393471	3.74773
J143-5-79	2896.44			4.18	49.16	27.46	3.31	1.84	0.12	0.79	6.73	1.6	0.025	0.031	1.7	8.34	15.1743	7.84446	21.0278	361.722	12.6518	23.9825	56.874	32.1071	160.67	28.7311	219.298	117.091	14.5627	183.562	17.8639	5.55078	18.5983	4444.42	2.81705	6.02233	0.811349	3.26852	1.02267	0.13318	1.25893	0.260025	2.08885	0.523888	1.74616	0.335372	2.51213	0.381894	10.2016
J143-5-81	2896.52			3.54	74.26	9.01	2.2	1.35	1.09	0.58	2.36	0.42	0.045	0.03	0.42	8.28	32.8643	2.36337	11.012	229.461	78.9762	12.7262	58.0727	124.774	216.066	13.5856	109.483	76.0419	22.9894	160.909	11.5275	2.35564	5.91186	1321.38	35.3873	56.9155	6.07606	19.1912	2.75109	0.490756	2.25364	0.439588	3.25135	0.782593	2.40373	0.388994	2.87395	0.425087	3.83651
J143-5-82	2896.54			2.97	71.99	10.46	2.14	1.45	1.05	0.68	2.72	0.49	0.029	0.023	0.62	8.5	32.0812	2.6417	12.1066	210.506	89.676	25.5188	47.3838	127.288	284.581	15.1993	124.953	81.5455	24.9009	192.439	12.2043	2.40174	6.90041	1387.17	29.2114	45.0673	4.75776	14.4843	2.03485	0.397425	1.8293	0.382523	3.09989	0.810475	2.72308	0.4614	3.3832	0.52291	4.51482
J143-5-83	2896.56			3.88	53.33	18.99	7.5	1.82	0.7	1.29	4.56	0.95	0.043	0.042	0.96	10.4	25.2392	5.09324	16.2802	457.223	68.644	46.989	178.544	105.792	213.544	21.4618	174.04	104.389	14.5846	132.497	14.7926	4.28883	13.1523	2623.01	21.7436	34.7212	3.64783	10.8147	1.44124	0.273903	1.31386	0.277046	2.08301	0.476914	1.62876	0.282953	2.04431	0.341933	5.10813
J143-5-84	2896.58			4.1	73.17	9.77	2.07	1.35	0.86	0.61	2.62	0.44	0.036	0.018	0.42	8.74	32.0468	2.42136	11.0065	190.069	76.028	8.84534	61.6016	103.327	216.347	13.7789	117.766	74.9634	15.4332	127.512	10.2682	2.25023	6.42911	1477.58	26.7116	42.0755	4.53976	13.8341	1.83192	0.366432	1.53566	0.273445	2.19699	0.521442	1.77654	0.311819	2.17146	0.349753	3.69549
J143-5-85	2896.59			3.8	58.56	12.62	4.12	2.77	3.59	0.83	3.49	0.62	0.1	0.069	0.58	12.78	32.2576	3.0143	15.3015	171.896	121.306	16.0682	102.229	222.641	358.292	17.423	161.572	133.863	42.5465	185.368	18.1433	2.90463	9.27914	1529.05	45.2803	83.468	10.2671	38.3923	7.25272	1.34564	6.98196	1.1479	7.20484	1.45192	4.37785	0.665866	4.30204	0.653733	4.95513
J143-5-86	2896.66			3.32	67.07	11.44	2.84	1.92	1.9	0.76	3.03	0.58	0.25	0.036	0.42	9.78	31.5735	2.74842	13.6384	276.908	111.705	9.88703	71.1843	139.606	216.565	16.8522	141.8	107.268	32.9439	167.327	15.1339	2.51935	7.89779	1467.31	39.5427	69.1621	8.69212	31.863	5.96426	1.2444	5.03243	0.864841	5.33931	1.08115	3.27023	0.51288	3.47588	0.549508	4.32408
J143-5-87	2896.81			2.9	83.23	6.06	1.15	0.75	0.5	0.43	1.64	0.28	0.032	0.012	0.28	5.86	35.8127	1.48043	7.27696	137.651	52.3553	14.7423	34.6699	80.9119	136.1	8.73313	71.6584	50.901	12.5174	115.135	9.76396	1.36607	3.4446	1146.73	18.4618	29.1894	2.95364	9.13641	1.30164	0.304783	1.03863	0.179742	1.47176	0.363913	1.33209	0.244248	1.71002	0.298662	2.55393
J143-5-88	2896.91			3.29	74.58	6.59	1.53	0.96	4.27	0.48	1.67	0.34	2.58	0.018	0.32	6.54	31.1285	1.67123	8.63431	130.07	68.9444	11.9024	38.7057	93.0242	140.551	10.1004	79.7042	195.871	81.914	110.588	8.43419	1.44707	4.09031	1126.89	55.9725	111.399	16.4137	70.1303	16.7147	3.85579	17.3038	2.55344	14.8718	2.60914	6.82135	0.872126	5.1474	0.759425	2.95093
J143-5-89	2897		V1	2.2	57.39	13.29	4.09	3.15	3.77	0.77	3.75	0.66	0.097	0.06	0.94	12.86	36.1788	3.40067	16.8054	206.327	101.703	23.2246	85.2578	148.86	222.276	19.6099	170.454	131.883	39.4753	186.814	23.2871	3.10318	9.8132	1559.28	53.3686	100.761	11.9157	42.5838	7.08425	1.20717	5.83532	0.995926	6.48884	1.31477	4.06076	0.622304	4.16747	0.679329	6.09922
J143-5-90	2897.03			4.35	65.35	10.14	4.45	1.96	2.64	0.74	2.81	0.76	0.079	0.079	0.86	10.84	30.8402	2.64312	10.0119	140.403	66.4226	23.2631	94.7821	153.958	390.053	14.118	123.685	117.037	32.686	186.805	47.3084	4.16175	6.94802	1810.03	48.726	87.4416	10.1429	36.4283	6.20441	1.15816	4.95687	0.838154	5.32183	1.13479	3.65053	0.58315	4.11104	0.62612	6.80858
J143-5-91	2897.43			3.77	57.35	14.76	3.77	2.26	3.07	1.06	4.09	0.71	0.4	0.039	0.74	12.52	33.3499	3.58319	15.4735	352.422	139.992	21.4995	136.909	240.186	453.058	19.8049	190.132	136.729	54.1699	164.504	16.4312	3.19111	11.4001	1644.6	46.3318	80.1832	10.7472	42.992	9.57297	2.09642	10.1305	1.5758	9.01454	1.80706	4.93926	0.719264	4.57132	0.738066	4.40229
J143-5-92	2897.51			2.59	58.23	14.66	3.55	2.22	3.48	1.06	4.1	0.74	0.42	0.04	0.54	11.6	32.6495	3.28615	15.802	241.234	122.315	16.6625	121.496	251.846	322.58	19.421	185.402	153	59.8865	155.455	16.64	3.06267	11.2796	1714.68	51.8389	94.7165	12.2595	49.1317	12.0537	2.56681	12.4102	1.80224	10.5924	1.91525	5.56645	0.752974	4.84521	0.789284	4.12925
J143-5-93	2897.61			3.12	54.99	14.55	4.32	2.54	3.52	1.06	3.98	0.75	0.14	0.056	0.66	14.04	32.9866	3.21134	16.234	259.764	122.316	24.4652	174.081	256.32	537.953	19.4355	182.804	128.846	45.0077	154.778	15.7477	3.02384	11.233	1551.7	46.4467	84.576	10.2096	38.3729	7.8286	1.48484	7.94033	1.29846	7.87157	1.49672	4.34341	0.626071	3.97623	0.668816	4.03173
J143-5-94	2897.76			2.89	61.36	17.03	4.3	2.32	1.81	0.9	4.71	0.86	0.092	0.031	0.48	6.4	40.1321	3.21831	17.1541	89.462	80.4611	18.9538	56.7964	55.7085	91.8699	23.5208	217.916	129.808	30.9539	174	19.3242	3.78314	11.6682	1942.99	54.9965	113.235	11.8354	42.8519	7.50943	1.05496	5.94796	0.907573	5.78647	1.08599	3.32338	0.47626	3.17598	0.52219	4.59286
J143-5-95	2898.01			3.25	61.63	16.83	3.9	2.31	1.92	0.92	4.66	0.81	0.095	0.027	0.58	6.68	40.2298	3.47733	17.4367	90.3633	80.6603	16.7742	50.8622	67.6084	119.732	23.5214	217.828	132.671	32.5315	178.332	19.9696	3.55108	12.0527	1942.27	53.9256	111.038	11.7291	42.1069	7.7805	1.1349	6.19398	0.988156	6.08185	1.1305	3.35751	0.487786	3.28069	0.530308	4.88746
J143-5-96	2898.2			1.65	63.46	16.31	3.81	2.22	1.75	1.06	4.57	0.82	0.088	0.029	0.6	5.9	39.8531	3.04648	17.2654	99.0604	75.673	18.1209	54.277	46.9536	91.044	23.4917	216.159	132.782	31.7848	188.13	20.2094	3.26632	12.0425	1917.24	58.7412	123.979	12.7364	44.9695	7.79506	1.15322	6.22098	0.991817	5.94993	1.10764	3.41228	0.473142	3.23694	0.559847	4.994
J143-5-97	2898.35			2.17	55.3	19.63	5.35	1.91	1.16	1.05	4.98	1.39	0.25	0.077	1	8.6	28.2171	3.41535	18.2925	118.474	54.7066	71.9199	115.078	149.573	259.812	25.5259	203.586	135.427	52.6168	421.301	116.798	4.88389	13.7547	2686.92	53.5125	133.431	15.0089	60.3358	14.4139	2.74599	12.4356	1.91311	10.9438	2.03174	5.42047	0.760118	4.82216	0.724711	15.6826
J143-5-98	2898.48			2.23	57.54	18.59	4.26	2.07	1.35	1.05	4.93	1.09	0.12	0.054	0.9	8.58	35.1922	3.6787	17.4858	104.531	78.7607	29.8476	101.587	236.236	264.822	24.6321	211.872	129.065	44.0392	317.434	69.6499	4.23495	13.7397	2336.7	46.3244	99.0974	10.2683	37.8701	8.32284	1.42686	7.30615	1.26141	8.18372	1.55851	4.71267	0.650137	4.39124	0.677398	10.8767
J143-5-99	2898.65			1.97	57.8	19.12	3.74	2.09	2.27	0.91	5.2	0.94	0.092	0.052	0.92	7.62	30.2814	3.81848	18.0384	83.9913	55.5733	18.2481	40.4349	73.4406	171.486	26.5616	229.442	160.019	45.225	314.445	69.7121	4.56986	14.2006	2736.08	67.0992	148.076	15.069	54.5538	10.8734	1.90588	8.62452	1.43028	8.80759	1.6274	4.73598	0.690368	4.28117	0.650754	9.56774
J143-5-100	2898.77	Jiancaogou Formation		0.14	52	21.47	6.19	1.81	1.2	1.06	5.43	1.58	0.31	0.096	1.08	8.46	22.4067	3.51688	18.5653	114.311	26.994	90.6193	103.368	51.8274	261.749	26.3489	200.975	146.645	61.4034	521.103	157.897	5.38062	13.987	3110.32	58.6233	157.214	18.1865	74.7664	18.0542	3.59754	15.1912	2.22888	13.1252	2.3499	6.39662	0.865374	5.31194	0.78056	20.7225
J143-5-101	2899.81			0.12	11.43	4.22	2.39	18.77	0.74	3.17	0.59	0.064	0.11	0.46	16.98	22.4018	2.11369	11.7731	67.2515	45.0879	37.8257	72.1807	65.1238	30.3497	15.5763	140.717	248.136	16.9883	111.178	16.0733	2.36758	7.59319	1488.07	39.8411	88.5353	7.80846	25.3278	4.06758	0.843413	3.29035	0.505544	3.17211	0.61834	1.85578	0.284023	1.86709	0.286218	3.10393	1.23468
J143-5-102	2900.75			0.06	9.55	4.43	4.25	21.51	0.57	2.68	0.47	0.053	0.27	0.62	23	18.5331	1.90747	10.0981	60.3091	36.4932	32.0063	49.9089	35.139	52.6085	12.7783	116.28	260.767	17.6033	82.3519	11.5225	2.03949	5.5324	1451.29	34.0226	81.1277	7.04208	24.8604	4.09832	0.763044	3.45413	0.541827	3.05792	0.634049	1.90172	0.276586	1.82077	0.291877	2.40417	0.890602
[truncated: 5 more columns]
